# Supplementary material for: Integrating Mendelian randomization and network toxicology to elucidate the causal role and mechanisms of Atrazine in breast cancer
Source: Research Square preprint supplement (doi:10.21203/rs.3.rs-6806548/v1), 2025-06-27
Supplement: Supplementary file 2 [file 1a943fca9905a946d46b6a5c.xlsx]

## Sheet: Table3 MR results
Exposure	Outcome	Nsnp	MR				Heterogeneity			Horizontal pleiotropy
			Method	OR(95%CI)	P value	FDR	I2(%)	Cochran's Q	P-value	P-value	MR-PRESSO P-value
ADIPOR2	Breast cancer	17	Inverse variance weighted	1.063(1.024-1.104)	0.001	0.008	0	11.8881	0.751648	0.119166	0.778
JARID2	Breast cancer	73	Inverse variance weighted	0.979(0.964-0.994)	0.006	0.029	0	60.3097	0.835511	0.0722543	0.848
DLEC1	Breast cancer	22	Inverse variance weighted	0.936(0.888-0.985)	0.012	0.05	6	22.4514	0.373908	0.293138	0.385
SPRTN	Breast cancer	23	Inverse variance weighted	0.917(0.879-0.957)	<0.001	<0.001	20	27.4386	0.195038	0.990299	0.235
DEF6	Breast cancer	110	Inverse variance weighted	1.015(1.005-1.025)	0.003	0.016	0	74.6801	0.995055	0.842284	0.997
TIMP2	Breast cancer	54	Inverse variance weighted	0.954(0.937-0.972)	<0.001	<0.001	0	49.2631	0.620451	0.450357	0.65
RFC1	Breast cancer	29	Inverse variance weighted	1.063(1.032-1.095)	<0.001	<0.001	0	17.7205	0.932972	0.249279	0.949
MXD1	Breast cancer	7	Inverse variance weighted	0.862(0.795-0.935)	<0.001	0.003	0	2.84005	0.828638	0.336238	0.769
BICRA	Breast cancer	23	Inverse variance weighted	1.060(1.023-1.099)	0.001	0.009	0	12.0632	0.95606	0.70238	0.95
SPEN	Breast cancer	12	Inverse variance weighted	1.072(1.018-1.129)	0.009	0.04	0	5.17227	0.922537	0.950211	0.926
ATG2B	Breast cancer	6	Inverse variance weighted	1.134(1.051-1.224)	0.001	0.008	0	2.25833	0.812367	0.785842	0.869
TP53BP1	Breast cancer	2	Inverse variance weighted	1.456(1.218-1.740)	<0.001	<0.001	0	0.000230912	0.987876	-	-
P4HA2	Breast cancer	15	Inverse variance weighted	1.260(1.164-1.364)	<0.001	<0.001	34	21.2759	0.0947674	0.956375	0.116
SDHA	Breast cancer	19	Inverse variance weighted	0.881(0.835-0.929)	<0.001	<0.001	15	21.1113	0.273837	0.530123	0.343
PTGS2	Breast cancer	24	Inverse variance weighted	0.957(0.930-0.985)	0.003	0.015	0	20.3366	0.621531	0.381918	0.596
ATP2A3	Breast cancer	15	Inverse variance weighted	0.883(0.836-0.933)	<0.001	<0.001	0	9.96324	0.764866	0.503463	0.788
SLC25A3	Breast cancer	30	Inverse variance weighted	0.958(0.937-0.981)	<0.001	0.003	0	27.8841	0.524116	0.586824	0.597
BZW1	Breast cancer	10	Inverse variance weighted	1.318(1.188-1.463)	<0.001	<0.001	42	15.4787	0.0785978	0.837147	0.133
RPS5	Breast cancer	29	Inverse variance weighted	0.957(0.933-0.982)	<0.001	0.007	0	15.402	0.973873	0.985665	0.983
WBP11	Breast cancer	11	Inverse variance weighted	1.122(1.065-1.183)	<0.001	<0.001	0	8.739	0.55704	0.842591	0.533
ANAPC5	Breast cancer	27	Inverse variance weighted	0.940(0.906-0.975)	<0.001	0.007	16	30.9193	0.231288	0.515899	0.294
SPTLC1	Breast cancer	7	Inverse variance weighted	1.145(1.052-1.245)	0.002	0.01	0	1.26236	0.973693	0.831643	0.971
CDC45	Breast cancer	2	Inverse variance weighted	0.778(0.660-0.916)	0.003	0.015	0	0.230758	0.630962	-	-
ITPR3	Breast cancer	162	Inverse variance weighted	1.016(1.007-1.025)	<0.001	0.002	9	176.551	0.190231	0.475629	0.21
SF3A1	Breast cancer	103	Inverse variance weighted	1.028(1.017-1.039)	<0.001	<0.001	8	111.247	0.249784	0.637138	0.251
SLC25A1	Breast cancer	48	Inverse variance weighted	0.951(0.927-0.976)	<0.001	0.001	20	58.5075	0.121118	0.364893	0.093
XBP1	Breast cancer	95	Inverse variance weighted	1.042(1.030-1.054)	<0.001	<0.001	6	99.8711	0.319896	0.396979	0.307
PDGFB	Breast cancer	43	Inverse variance weighted	1.067(1.043-1.093)	<0.001	<0.001	0	40.6731	0.529223	0.280483	0.593
MTMR3	Breast cancer	102	Inverse variance weighted	0.951(0.938-0.964)	<0.001	<0.001	0	101.42	0.469549	0.288251	0.498
GINS1	Breast cancer	3	Inverse variance weighted	0.555(0.460-0.670)	<0.001	<0.001	0	0.0295556	0.985331	0.963336	-
CORO1A	Breast cancer	17	Inverse variance weighted	0.938(0.895-0.982)	0.006	0.031	0	7.11796	0.97092	0.785964	0.965
MAPK3	Breast cancer	134	Inverse variance weighted	0.978(0.969-0.987)	<0.001	<0.001	0	105.541	0.961985	0.387236	0.97
SLC7A6	Breast cancer	117	Inverse variance weighted	1.021(1.009-1.034)	<0.001	0.007	0	114.156	0.531026	0.304825	0.538
LACTB	Breast cancer	27	Inverse variance weighted	0.945(0.913-0.979)	0.001	0.009	0	25.2113	0.507039	0.836286	0.575
RAB11A	Breast cancer	4	Inverse variance weighted	1.159(1.033-1.299)	0.012	0.05	0	2.7051	0.439362	0.714984	0.542
CA2	Breast cancer	77	Inverse variance weighted	0.967(0.952-0.981)	<0.001	<0.001	0	72.6765	0.586791	0.208298	0.606
CCNE1	Breast cancer	10	Inverse variance weighted	0.840(0.789-0.895)	<0.001	<0.001	0	6.97065	0.640175	0.664931	0.613
PTPRS	Breast cancer	11	Inverse variance weighted	1.142(1.058-1.233)	<0.001	0.005	12	11.4211	0.325663	0.303937	0.376
CAV1	Breast cancer	6	Inverse variance weighted	1.165(1.035-1.310)	0.011	0.049	0	0.525503	0.99116	0.92498	0.984
NRF1	Breast cancer	3	Inverse variance weighted	1.200(1.045-1.378)	0.01	0.044	0	0.67697	0.71285	0.584368	-
TWNK	Breast cancer	7	Inverse variance weighted	1.102(1.028-1.182)	0.006	0.031	0	1.66435	0.94784	0.921962	0.966
TNKS2	Breast cancer	37	Inverse variance weighted	0.927(0.904-0.951)	<0.001	<0.001	0	24.8412	0.919478	0.0670887	0.936
STN1	Breast cancer	18	Inverse variance weighted	1.080(1.031-1.132)	0.001	0.008	17	20.4626	0.251256	0.958995	0.329
LGALS3BP	Breast cancer	26	Inverse variance weighted	1.062(1.025-1.100)	<0.001	0.006	0	16.9899	0.88216	0.495505	0.892
HSD17B1	Breast cancer	21	Inverse variance weighted	1.080(1.034-1.129)	<0.001	0.005	11	22.5107	0.313453	0.462624	0.347
TMEM97	Breast cancer	125	Inverse variance weighted	1.016(1.005-1.026)	0.004	0.019	1	125.131	0.454652	0.12731	0.474
INPP4B	Breast cancer	90	Inverse variance weighted	1.029(1.013-1.045)	<0.001	0.004	17	107.335	0.090277	0.706597	0.094
LPXN	Breast cancer	26	Inverse variance weighted	1.034(1.015-1.054)	<0.001	0.004	0	24.4627	0.492784	0.839008	0.618
CCND1	Breast cancer	13	Inverse variance weighted	0.892(0.839-0.949)	<0.001	0.003	34	18.0968	0.112783	0.402433	0.147
VDR	Breast cancer	42	Inverse variance weighted	0.947(0.922-0.973)	<0.001	<0.001	0	28.6859	0.926555	0.966748	0.934
IFNG	Breast cancer	8	Inverse variance weighted	1.124(1.042-1.213)	0.002	0.014	0	3.50618	0.83457	0.25623	0.836
RNF8	Breast cancer	21	Inverse variance weighted	0.937(0.896-0.981)	0.005	0.026	0	14.0322	0.82886	0.823995	0.821
MED23	Breast cancer	21	Inverse variance weighted	1.059(1.025-1.094)	<0.001	0.004	0	6.46162	0.998113	0.666818	0.996
MRPS30	Breast cancer	2	Inverse variance weighted	1.614(1.333-1.954)	<0.001	<0.001	0	0.0339472	0.853819	-	-
PDE8B	Breast cancer	33	Inverse variance weighted	0.969(0.946-0.992)	0.01	0.043	0	20.4246	0.943492	0.126327	0.948
ARRDC3	Breast cancer	3	Inverse variance weighted	1.499(1.283-1.750)	<0.001	<0.001	0	2.00265	0.367393	0.40838	-
SPTBN1	Breast cancer	93	Inverse variance weighted	0.984(0.973-0.996)	0.007	0.033	0	80.5778	0.796723	0.682397	0.81
ORC2	Breast cancer	8	Inverse variance weighted	1.274(1.160-1.400)	<0.001	<0.001	0	2.63235	0.916806	0.724919	0.924
AKT3	Breast cancer	13	Inverse variance weighted	1.110(1.049-1.174)	<0.001	0.002	0	8.63127	0.734061	0.0663709	0.765
CAMSAP2	Breast cancer	57	Inverse variance weighted	0.972(0.951-0.994)	0.012	0.049	16	66.5251	0.158561	0.418498	0.193
ATF6	Breast cancer	52	Inverse variance weighted	1.024(1.009-1.040)	0.002	0.011	11	57.5082	0.246903	0.269102	0.293
CCR2	Breast cancer	70	Inverse variance weighted	1.032(1.012-1.051)	0.001	0.008	0	61.2709	0.734643	0.592123	0.752
ATP7B	Breast cancer	52	Inverse variance weighted	1.088(1.064-1.113)	<0.001	<0.001	0	40.548	0.852729	0.122705	0.884
CDKN1A	Breast cancer	33	Inverse variance weighted	0.948(0.922-0.975)	<0.001	0.002	0	29.7878	0.578957	0.522855	0.639
KTN1	Breast cancer	43	Inverse variance weighted	1.066(1.044-1.088)	<0.001	<0.001	0	29.0658	0.935057	0.47126	0.953
PTPRB	Breast cancer	24	Inverse variance weighted	0.913(0.866-0.961)	<0.001	0.004	17	27.769	0.224642	0.49259	0.257
SRD5A3	Breast cancer	99	Inverse variance weighted	1.021(1.011-1.032)	<0.001	<0.001	0	89.0166	0.73052	0.0531796	0.754
SPECC1	Breast cancer	42	Inverse variance weighted	1.067(1.042-1.092)	<0.001	<0.001	0	38.6144	0.577175	0.226171	0.613
DUT	Breast cancer	21	Inverse variance weighted	1.054(1.021-1.088)	0.001	0.009	26	27.0421	0.134084	0.915462	0.129
ATP1B2	Breast cancer	26	Inverse variance weighted	1.081(1.047-1.116)	<0.001	<0.001	11	28.135	0.301676	0.591618	0.397
EGLN3	Breast cancer	27	Inverse variance weighted	1.083(1.041-1.127)	<0.001	<0.001	28	35.9456	0.092674	0.0838749	0.113
MLLT1	Breast cancer	3	Inverse variance weighted	0.815(0.699-0.951)	0.009	0.042	0	0.178583	0.914579	0.788235	-
SYNE1	Breast cancer	7	Inverse variance weighted	0.872(0.804-0.945)	<0.001	0.006	0	3.37929	0.759955	0.327637	0.742
NFATC1	Breast cancer	31	Inverse variance weighted	1.042(1.009-1.076)	0.012	0.049	0	19.5219	0.928398	0.470968	0.948
CHD1L	Breast cancer	69	Inverse variance weighted	1.031(1.011-1.053)	0.003	0.015	0	54.4494	0.883243	0.506164	0.902
LLGL1	Breast cancer	9	Inverse variance weighted	0.851(0.759-0.954)	0.006	0.029	0	2.12557	0.976918	0.189271	0.968
MYBBP1A	Breast cancer	8	Inverse variance weighted	1.136(1.061-1.216)	<0.001	0.002	0	1.08385	0.99336	0.650091	0.994
PEMT	Breast cancer	27	Inverse variance weighted	0.910(0.879-0.943)	<0.001	<0.001	4	26.947	0.412117	0.0778701	0.518
MORC2	Breast cancer	35	Inverse variance weighted	1.064(1.033-1.096)	<0.001	<0.001	0	17.5611	0.991096	0.252475	0.993
HSD17B4	Breast cancer	36	Inverse variance weighted	0.958(0.928-0.990)	0.011	0.048	21	44.3703	0.133207	0.197865	0.15
GSTM1	Breast cancer	210	Inverse variance weighted	0.971(0.963-0.978)	<0.001	<0.001	14	242.865	0.0540564	0.899048	0.06
ANXA1	Breast cancer	90	Inverse variance weighted	0.979(0.966-0.992)	0.001	0.009	0	77.0155	0.813673	0.466047	0.825
MDM2	Breast cancer	68	Inverse variance weighted	1.031(1.016-1.047)	<0.001	<0.001	0	66.4292	0.49672	0.422805	0.507
EGLN1	Breast cancer	20	Inverse variance weighted	1.090(1.056-1.125)	<0.001	<0.001	0	18.8072	0.469265	0.648999	0.562
LAMC1	Breast cancer	139	Inverse variance weighted	1.037(1.027-1.048)	<0.001	<0.001	6	146.537	0.293372	0.386303	0.303
USP37	Breast cancer	11	Inverse variance weighted	0.904(0.862-0.948)	<0.001	<0.001	0	5.34986	0.866616	0.239494	0.907
CYP27A1	Breast cancer	126	Inverse variance weighted	0.985(0.978-0.992)	<0.001	<0.001	0	124.104	0.505814	0.350387	0.524
CKAP4	Breast cancer	32	Inverse variance weighted	0.949(0.923-0.975)	<0.001	0.002	0	30.9746	0.467491	0.189174	0.42
GPNMB	Breast cancer	88	Inverse variance weighted	1.038(1.022-1.053)	<0.001	<0.001	0	85.2564	0.532846	0.0650589	0.565
IL6	Breast cancer	9	Inverse variance weighted	0.876(0.805-0.953)	0.002	0.013	0	6.40215	0.602281	0.576582	0.634
TUBB2B	Breast cancer	7	Inverse variance weighted	1.080(1.021-1.142)	0.007	0.034	0	3.22485	0.780143	0.597325	0.794
FLOT1	Breast cancer	172	Inverse variance weighted	0.964(0.952-0.975)	<0.001	<0.001	0	170.004	0.507142	0.317554	0.488
MYOF	Breast cancer	48	Inverse variance weighted	1.028(1.006-1.051)	0.011	0.048	0	32.0372	0.953087	0.588016	0.962
IDH1	Breast cancer	16	Inverse variance weighted	1.147(1.091-1.205)	<0.001	<0.001	0	11.4268	0.721797	0.050604	0.749
PDE5A	Breast cancer	29	Inverse variance weighted	1.090(1.055-1.126)	<0.001	<0.001	0	21.5952	0.799678	0.467367	0.843
GLIPR1	Breast cancer	52	Inverse variance weighted	0.966(0.951-0.982)	<0.001	<0.001	9	56.1198	0.288955	0.188683	0.353
ESR2	Breast cancer	45	Inverse variance weighted	0.950(0.925-0.977)	<0.001	0.002	0	37.6526	0.738973	0.476675	0.781
TLE3	Breast cancer	2	Inverse variance weighted	1.264(1.061-1.505)	0.009	0.04	0	0.907727	0.340718	-	-
PIF1	Breast cancer	20	Inverse variance weighted	1.081(1.029-1.136)	0.002	0.012	0	6.82975	0.995067	0.28893	0.997
POLG	Breast cancer	9	Inverse variance weighted	1.094(1.023-1.170)	0.009	0.041	0	6.82154	0.556004	0.741629	0.597
CDH13	Breast cancer	17	Inverse variance weighted	1.120(1.068-1.174)	<0.001	<0.001	0	5.99237	0.988178	0.760148	0.993
AKT1	Breast cancer	31	Inverse variance weighted	0.933(0.906-0.961)	<0.001	<0.001	0	12.7089	0.997599	0.773075	0.995
ATP1B1	Breast cancer	96	Inverse variance weighted	1.028(1.013-1.044)	<0.001	0.003	0	91.9619	0.569179	0.214597	0.583
CDC42BPA	Breast cancer	44	Inverse variance weighted	1.042(1.009-1.075)	0.011	0.048	0	34.0433	0.833761	0.928277	0.843
EPHX1	Breast cancer	11	Inverse variance weighted	1.122(1.053-1.195)	<0.001	0.003	0	9.48251	0.487004	0.623323	0.505
PIK3R1	Breast cancer	11	Inverse variance weighted	0.903(0.842-0.969)	0.005	0.024	44	17.9349	0.0560722	0.690648	0.102
SSBP2	Breast cancer	37	Inverse variance weighted	1.058(1.019-1.099)	0.003	0.017	24	47.1723	0.100691	0.930548	0.435
MEPCE	Breast cancer	52	Inverse variance weighted	0.936(0.912-0.960)	<0.001	<0.001	0	42.9948	0.779763	0.172336	0.817
NSD3	Breast cancer	15	Inverse variance weighted	1.051(1.013-1.092)	0.009	0.041	0	10.0442	0.758947	0.470005	0.796
CYP17A1	Breast cancer	8	Inverse variance weighted	1.172(1.068-1.286)	<0.001	0.006	0	2.53527	0.924418	0.324584	0.931
LTO1	Breast cancer	4	Inverse variance weighted	1.390(1.211-1.596)	<0.001	<0.001	35	4.61277	0.202449	0.460334	0.406
SERP2	Breast cancer	6	Inverse variance weighted	0.907(0.842-0.976)	0.009	0.042	0	3.42054	0.635444	0.180861	0.676
DST	Breast cancer	15	Inverse variance weighted	1.123(1.050-1.201)	<0.001	0.005	12	15.9074	0.31906	0.749871	0.326
LPCAT1	Breast cancer	23	Inverse variance weighted	0.938(0.900-0.976)	0.002	0.011	3	22.644	0.422061	0.791177	0.429
SUSD3	Breast cancer	95	Inverse variance weighted	1.030(1.014-1.045)	<0.001	0.002	0	88.7461	0.633705	0.711535	0.668
ZYX	Breast cancer	67	Inverse variance weighted	0.966(0.953-0.979)	<0.001	<0.001	0	59.8629	0.689047	0.337844	0.732
KALRN	Breast cancer	22	Inverse variance weighted	1.063(1.022-1.106)	0.002	0.014	0	14.4874	0.847766	0.496706	0.87
ITGB2	Breast cancer	73	Inverse variance weighted	0.981(0.969-0.993)	0.002	0.013	0	65.5497	0.690918	0.161605	0.735
BRSK1	Breast cancer	15	Inverse variance weighted	0.888(0.843-0.937)	<0.001	<0.001	0	6.27175	0.95917	0.492255	0.944
GFI1	Breast cancer	17	Inverse variance weighted	1.137(1.072-1.206)	<0.001	<0.001	0	12.5403	0.706025	0.331886	0.761
NCSTN	Breast cancer	101	Inverse variance weighted	0.969(0.957-0.982)	<0.001	<0.001	2	101.937	0.427318	0.785379	0.455
COL6A3	Breast cancer	8	Inverse variance weighted	0.921(0.864-0.981)	0.011	0.047	0	3.56742	0.828033	0.276482	0.831
FSTL1	Breast cancer	45	Inverse variance weighted	1.033(1.008-1.059)	0.008	0.039	0	30.2529	0.943021	0.216222	0.947
TOPBP1	Breast cancer	14	Inverse variance weighted	1.089(1.031-1.151)	0.002	0.013	0	7.3473	0.883378	0.859975	0.893
CASP3	Breast cancer	40	Inverse variance weighted	1.032(1.011-1.054)	0.003	0.017	0	38.6908	0.483839	0.648623	0.487
TSHR	Breast cancer	16	Inverse variance weighted	1.116(1.066-1.170)	<0.001	<0.001	0	11.4371	0.721042	0.102804	0.736
PRKCB	Breast cancer	122	Inverse variance weighted	0.984(0.973-0.996)	0.009	0.041	4	125.987	0.359803	0.919856	0.365
DDIT4	Breast cancer	7	Inverse variance weighted	1.170(1.067-1.283)	<0.001	0.006	0	0.796647	0.992163	0.526292	0.989
MAP2K1	Breast cancer	21	Inverse variance weighted	0.918(0.878-0.959)	<0.001	0.001	0	18.6381	0.545451	0.231453	0.594
ADORA2B	Breast cancer	86	Inverse variance weighted	0.936(0.921-0.952)	<0.001	<0.001	5	89.1967	0.356558	0.0530131	0.369
HSPA4	Breast cancer	39	Inverse variance weighted	1.040(1.014-1.067)	0.003	0.015	0	20.9745	0.98862	0.641213	0.991
POLR1C	Breast cancer	2	Inverse variance weighted	0.804(0.695-0.930)	0.003	0.017	0	1.59896e-05	0.99681	-	-
BCL2L1	Breast cancer	4	Inverse variance weighted	1.232(1.069-1.419)	0.004	0.02	0	0.841312	0.839562	0.958477	0.872
EXOSC10	Breast cancer	8	Inverse variance weighted	1.162(1.086-1.243)	<0.001	<0.001	0	3.70733	0.812802	0.552129	0.839
CEBPB	Breast cancer	23	Inverse variance weighted	0.915(0.876-0.956)	<0.001	<0.001	18	26.7813	0.21965	0.116291	0.212
CCNE2	Breast cancer	9	Inverse variance weighted	0.856(0.793-0.924)	<0.001	<0.001	0	5.38205	0.716069	0.403611	0.712
BANF1	Breast cancer	84	Inverse variance weighted	0.960(0.944-0.976)	<0.001	<0.001	9	90.8557	0.260157	0.28883	0.284
LPL	Breast cancer	78	Inverse variance weighted	1.022(1.006-1.038)	0.007	0.032	0	68.0029	0.758363	0.567263	0.775
DOK7	Breast cancer	30	Inverse variance weighted	0.950(0.924-0.977)	<0.001	0.003	1	29.2607	0.451552	0.540958	0.477
RPLP2	Breast cancer	2	Inverse variance weighted	0.791(0.695-0.902)	<0.001	0.004	0	0.661588	0.416	-	-
ERN1	Breast cancer	27	Inverse variance weighted	1.044(1.020-1.070)	<0.001	0.003	0	12.4132	0.988594	0.928819	0.989
PFAS	Breast cancer	25	Inverse variance weighted	1.057(1.019-1.096)	0.003	0.015	0	19.3113	0.735189	0.751851	0.738
NQO1	Breast cancer	33	Inverse variance weighted	1.037(1.014-1.061)	0.001	0.009	23	41.3595	0.124313	0.712453	0.164
F2R	Breast cancer	61	Inverse variance weighted	1.050(1.033-1.068)	<0.001	<0.001	0	47.2819	0.883547	0.100951	0.9
CHEK2	Breast cancer	5	Inverse variance weighted	1.342(1.207-1.492)	<0.001	<0.001	0	2.64993	0.618004	0.223683	0.696
CCR4	Breast cancer	28	Inverse variance weighted	0.921(0.895-0.948)	<0.001	<0.001	0	20.8199	0.794652	0.108878	0.817
H1-10	Breast cancer	17	Inverse variance weighted	1.090(1.031-1.152)	0.002	0.014	0	4.3905	0.998048	0.847907	0.999
FAAP100	Breast cancer	10	Inverse variance weighted	1.109(1.036-1.187)	0.003	0.015	0	4.47856	0.877194	0.723409	0.892
ADARB2	Breast cancer	118	Inverse variance weighted	1.027(1.014-1.040)	<0.001	<0.001	4	121.653	0.365532	0.694429	0.359
RPS23	Breast cancer	213	Inverse variance weighted	1.038(1.032-1.044)	<0.001	<0.001	0	196.598	0.768628	0.0927244	0.797
BCR	Breast cancer	63	Inverse variance weighted	0.973(0.957-0.990)	0.002	0.01	0	59.9605	0.549786	0.301501	0.59
LRRK2	Breast cancer	99	Inverse variance weighted	1.073(1.054-1.093)	<0.001	<0.001	9	107.375	0.243004	0.561148	0.268
LAMA2	Breast cancer	7	Inverse variance weighted	0.862(0.789-0.943)	0.001	0.008	36	9.35889	0.154378	0.0985208	0.23
MAP3K5	Breast cancer	52	Inverse variance weighted	1.031(1.011-1.052)	0.003	0.015	0	33.4868	0.972384	0.445414	0.975
SIPA1L1	Breast cancer	14	Inverse variance weighted	1.075(1.016-1.137)	0.012	0.05	0	11.9663	0.530413	0.103146	0.531
ELANE	Breast cancer	8	Inverse variance weighted	1.111(1.028-1.201)	0.008	0.037	6	7.42227	0.386274	0.22522	0.468
WWP2	Breast cancer	17	Inverse variance weighted	1.074(1.020-1.130)	0.006	0.031	15	18.856	0.2762	0.509256	0.31
NCOA6	Breast cancer	36	Inverse variance weighted	1.181(1.146-1.216)	<0.001	<0.001	0	24.7193	0.902031	0.772222	0.934
HSPA1L	Breast cancer	21	Inverse variance weighted	0.903(0.864-0.945)	<0.001	<0.001	5	21.1179	0.390222	0.586362	0.446
APOM	Breast cancer	11	Inverse variance weighted	1.170(1.093-1.252)	<0.001	<0.001	0	3.82381	0.954946	0.642616	0.972
GSTM2	Breast cancer	139	Inverse variance weighted	0.958(0.947-0.968)	<0.001	<0.001	0	111.049	0.955524	0.941905	0.961
DNAJC9	Breast cancer	10	Inverse variance weighted	1.089(1.039-1.141)	<0.001	0.003	0	4.75513	0.85511	0.601097	0.901
STARD10	Breast cancer	92	Inverse variance weighted	0.951(0.939-0.963)	<0.001	<0.001	16	108.31	0.104123	0.362347	0.104
RPS18	Breast cancer	32	Inverse variance weighted	0.954(0.928-0.982)	0.001	0.008	0	27.8847	0.627112	0.0988288	0.624
