# Supplementary material for: Integrating Mendelian randomization and network toxicology to elucidate the causal role and mechanisms of Atrazine in breast cancer
Source: Research Square preprint supplement (doi:10.21203/rs.3.rs-6806548/v1), 2025-06-27
Supplement: Supplementary file 3 [file 3809c9680a83cce181c50c0f.xlsx]

## Sheet: Sheet1
Table S3 Core targets screened from PPI network
name	Degree	Closeness Centrality	Betweenness Centrality	Topological Coefficient
AKT1	32	0.880952	0.159784	0.36402
CASP3	29	0.822222	0.107141	0.387698
HSPA4	24	0.74	0.080566	0.411036
CCND1	23	0.72549	0.0349811	0.438308
MAPK3	23	0.72549	0.0426863	0.435958
IL6	22	0.711538	0.0234648	0.454545
BCL2L1	21	0.698113	0.0281499	0.445302
CDKN1A	21	0.698113	0.0424461	0.420849
MDM2	20	0.685185	0.0252451	0.455405
PIK3R1	19	0.672727	0.0241859	0.44808
PTGS2	18	0.660714	0.0138186	0.477477
XBP1	17	0.649123	0.0425626	0.45151
IFNG	16	0.637931	0.00775362	0.501689
MAP2K1	15	0.627119	0.00864026	0.531532
CAV1	14	0.616667	0.00484583	0.53668
ESR2	12	0.596774	0.00594522	0.538288
MAP3K5	12	0.596774	0.00396069	0.533784
ANXA1	11	0.587302	0.00152772	0.535627
CHEK2	11	0.569231	0.00553558	0.506494
CEBPB	10	0.578125	0.00410162	0.510811
ITGB2	9	0.569231	0.00288352	0.486486
PRKCB	9	0.569231	0.00364055	0.51952
AKT3	9	0.552239	0.00038025	0.634921
LRRK2	9	0.560606	0.0113259	0.41358
CCNE1	8	0.544118	0.0005005	0.585714
CCR2	8	0.544118	0.0032546	0.546429
NQO1	8	0.560606	0	0.648649
ERN1	8	0.528571	0.00192454	0.537879
SDHA	7	0.544118	0.0148105	0.392857
ITPR3	7	0.552239	0.00194591	0.50193
CCNE2	7	0.536232	0.00145397	0.526531
TP53BP1	6	0.528571	0.0010786	0.561905
IDH1	6	0.528571	0.00105105	0.552381
RPS5	6	0.521127	0.0023059	0.446078
RPS23	6	0.486842	0.00163497	0.396552
RPS18	6	0.486842	0.00163497	0.396552
TOPBP1	5	0.5	0.0003003	0.48125
CYP17A1	4	0.5	0.00025025	0.568182
