# Supplementary material for: Integrating Mendelian randomization and network toxicology to elucidate the causal role and mechanisms of Atrazine in breast cancer
Source: Research Square preprint supplement (doi:10.21203/rs.3.rs-6806548/v1), 2025-06-27
Supplement: Supplementary file 4 [file 8feb7c43002c4ad5b967b1d9.xlsx]

## Sheet: Sheet1
Table 2 Docking results of available proteins with small molecules
Docking pair	Target	Target PBD ID	Affinity(kcal/moL)
Atrazine-AKT1	AKT1	8UVY	-6.1
Atrazine-CASP3	CASP3	4QU8	-5.3
Atrazine-HSPA4	HSPA4	AF-P34932-F1	-5.1
Atrazine-CCND1	CCND1	2W96	-6.1
Atrazine- MAPK3	MAPK3	4QTB	-6.4
