# Supplementary material for: Integrating Mendelian randomization and network toxicology to elucidate the causal role and mechanisms of Atrazine in breast cancer
Source: Research Square preprint supplement (doi:10.21203/rs.3.rs-6806548/v1), 2025-06-27
Supplement: Supplementary file 5 [file be5819f1a1531a8ca6358f22.xlsx]

## Sheet: Table1
Data.source	Phenotype	Sample.size	Population	Adjustment
eqtl-a-ENSG00000004142	POLDIP2	31684	European	Males and Females
eqtl-a-ENSG00000004897	CDC27	31684	European	Males and Females
eqtl-a-ENSG00000007402	CACNA2D2	31684	European	Males and Females
eqtl-a-ENSG00000008083	JARID2	31684	European	Males and Females
eqtl-a-ENSG00000008394	MGST1	31684	European	Males and Females
eqtl-a-ENSG00000008952	SEC62	31684	European	Males and Females
eqtl-a-ENSG00000010292	NCAPD2	31684	European	Males and Females
eqtl-a-ENSG00000010322	NISCH	31684	European	Males and Females
eqtl-a-ENSG00000012660	ELOVL5	31684	European	Males and Females
eqtl-a-ENSG00000013364	MVP	31684	European	Males and Females
eqtl-a-ENSG00000014216	CAPN1	31684	European	Males and Females
eqtl-a-ENSG00000017260	ATP2C1	31684	European	Males and Females
eqtl-a-ENSG00000023445	BIRC3	31684	European	Males and Females
eqtl-a-ENSG00000025770	NCAPH2	31684	European	Males and Females
eqtl-a-ENSG00000030419	IKZF2	31684	European	Males and Females
eqtl-a-ENSG00000033327	GAB2	31684	European	Males and Females
eqtl-a-ENSG00000037474	NSUN2	31684	European	Males and Females
eqtl-a-ENSG00000044574	HSPA5	31684	European	Males and Females
eqtl-a-ENSG00000049759	NEDD4L	31684	European	Males and Females
eqtl-a-ENSG00000051108	HERPUD1	31684	European	Males and Females
eqtl-a-ENSG00000054356	PTPRN	31684	European	Males and Females
eqtl-a-ENSG00000057935	MTA3	31684	European	Males and Females
eqtl-a-ENSG00000058866	DGKG	31684	European	Males and Females
eqtl-a-ENSG00000060982	BCAT1	31684	European	Males and Females
eqtl-a-ENSG00000062485	CS	31684	European	Males and Females
eqtl-a-ENSG00000063169	BICRA	31684	European	Males and Females
eqtl-a-ENSG00000063176	SPHK2	31684	European	Males and Females
eqtl-a-ENSG00000064300	NGFR	31684	European	Males and Females
eqtl-a-ENSG00000065526	SPEN	31684	European	Males and Females
eqtl-a-ENSG00000065989	PDE4A	31684	European	Males and Females
eqtl-a-ENSG00000066056	TIE1	31684	European	Males and Females
eqtl-a-ENSG00000066468	FGFR2	31684	European	Males and Females
eqtl-a-ENSG00000068028	RASSF1	31684	European	Males and Females
eqtl-a-ENSG00000069345	DNAJA2	31684	European	Males and Females
eqtl-a-ENSG00000070404	FSTL3	31684	European	Males and Females
eqtl-a-ENSG00000070669	ASNS	31684	European	Males and Females
eqtl-a-ENSG00000070770	CSNK2A2	31684	European	Males and Females
eqtl-a-ENSG00000071539	TRIP13	31684	European	Males and Females
eqtl-a-ENSG00000072062	PRKACA	31684	European	Males and Females
eqtl-a-ENSG00000072310	SREBF1	31684	European	Males and Females
eqtl-a-ENSG00000072778	ACADVL	31684	European	Males and Females
eqtl-a-ENSG00000074416	MGLL	31684	European	Males and Females
eqtl-a-ENSG00000075223	SEMA3C	31684	European	Males and Females
eqtl-a-ENSG00000078900	TP73	31684	European	Males and Females
eqtl-a-ENSG00000079308	TNS1	31684	European	Males and Females
eqtl-a-ENSG00000079432	CIC	31684	European	Males and Females
eqtl-a-ENSG00000081026	MAGI3	31684	European	Males and Females
eqtl-a-ENSG00000081177	EXD2	31684	European	Males and Females
eqtl-a-ENSG00000081913	PHLPP1	31684	European	Males and Females
eqtl-a-ENSG00000082701	GSK3B	31684	European	Males and Females
eqtl-a-ENSG00000084207	GSTP1	31684	European	Males and Females
eqtl-a-ENSG00000089053	ANAPC5	31684	European	Males and Females
eqtl-a-ENSG00000090054	SPTLC1	31684	European	Males and Females
eqtl-a-ENSG00000090447	TFAP4	31684	European	Males and Females
eqtl-a-ENSG00000090674	MCOLN1	31684	European	Males and Females
eqtl-a-ENSG00000090905	TNRC6A	31684	European	Males and Females
eqtl-a-ENSG00000092330	TINF2	31684	European	Males and Females
eqtl-a-ENSG00000092964	DPYSL2	31684	European	Males and Females
eqtl-a-ENSG00000095637	SORBS1	31684	European	Males and Females
eqtl-a-ENSG00000096433	ITPR3	31684	European	Males and Females
eqtl-a-ENSG00000096968	JAK2	31684	European	Males and Females
eqtl-a-ENSG00000099194	SCD	31684	European	Males and Females
eqtl-a-ENSG00000099860	GADD45B	31684	European	Males and Females
eqtl-a-ENSG00000099899	TRMT2A	31684	European	Males and Females
eqtl-a-ENSG00000099995	SF3A1	31684	European	Males and Females
eqtl-a-ENSG00000100003	SEC14L2	31684	European	Males and Females
eqtl-a-ENSG00000100028	SNRPD3	31684	European	Males and Females
eqtl-a-ENSG00000100075	SLC25A1	31684	European	Males and Females
eqtl-a-ENSG00000100084	HIRA	31684	European	Males and Females
eqtl-a-ENSG00000100292	HMOX1	31684	European	Males and Females
eqtl-a-ENSG00000100311	PDGFB	31684	European	Males and Females
eqtl-a-ENSG00000100320	RBFOX2	31684	European	Males and Females
eqtl-a-ENSG00000100330	MTMR3	31684	European	Males and Females
eqtl-a-ENSG00000100348	TXN2	31684	European	Males and Females
eqtl-a-ENSG00000100426	ZBED4	31684	European	Males and Females
eqtl-a-ENSG00000100479	POLE2	31684	European	Males and Females
eqtl-a-ENSG00000100504	PYGL	31684	European	Males and Females
eqtl-a-ENSG00000100664	EIF5	31684	European	Males and Females
eqtl-a-ENSG00000100678	SLC8A3	31684	European	Males and Females
eqtl-a-ENSG00000100836	PABPN1	31684	European	Males and Females
eqtl-a-ENSG00000100889	PCK2	31684	European	Males and Females
eqtl-a-ENSG00000100979	PLTP	31684	European	Males and Females
eqtl-a-ENSG00000101003	GINS1	31684	European	Males and Females
eqtl-a-ENSG00000101138	CSTF1	31684	European	Males and Females
eqtl-a-ENSG00000101255	TRIB3	31684	European	Males and Females
eqtl-a-ENSG00000101310	SEC23B	31684	European	Males and Females
eqtl-a-ENSG00000102879	CORO1A	31684	European	Males and Females
eqtl-a-ENSG00000103222	ABCC1	31684	European	Males and Females
eqtl-a-ENSG00000103642	LACTB	31684	European	Males and Females
eqtl-a-ENSG00000103671	TRIP4	31684	European	Males and Females
eqtl-a-ENSG00000103769	RAB11A	31684	European	Males and Females
eqtl-a-ENSG00000104093	DMXL2	31684	European	Males and Females
eqtl-a-ENSG00000104419	NDRG1	31684	European	Males and Females
eqtl-a-ENSG00000104497	SNX16	31684	European	Males and Females
eqtl-a-ENSG00000104518	GSDMD	31684	European	Males and Females
eqtl-a-ENSG00000104856	RELB	31684	European	Males and Females
eqtl-a-ENSG00000105204	DYRK1B	31684	European	Males and Females
eqtl-a-ENSG00000105327	BBC3	31684	European	Males and Females
eqtl-a-ENSG00000105409	ATP1A3	31684	European	Males and Females
eqtl-a-ENSG00000105426	PTPRS	31684	European	Males and Females
eqtl-a-ENSG00000105701	FKBP8	31684	European	Males and Females
eqtl-a-ENSG00000105723	GSK3A	31684	European	Males and Females
eqtl-a-ENSG00000105810	CDK6	31684	European	Males and Females
eqtl-a-ENSG00000105835	NAMPT	31684	European	Males and Females
eqtl-a-ENSG00000106366	SERPINE1	31684	European	Males and Females
eqtl-a-ENSG00000106692	FKTN	31684	European	Males and Females
eqtl-a-ENSG00000107099	DOCK8	31684	European	Males and Females
eqtl-a-ENSG00000107290	SETX	31684	European	Males and Females
eqtl-a-ENSG00000107485	GATA3	31684	European	Males and Females
eqtl-a-ENSG00000107796	ACTA2	31684	European	Males and Females
eqtl-a-ENSG00000107815	TWNK	31684	European	Males and Females
eqtl-a-ENSG00000108064	TFAM	31684	European	Males and Females
eqtl-a-ENSG00000108107	RPL28	31684	European	Males and Females
eqtl-a-ENSG00000108179	PPIF	31684	European	Males and Females
eqtl-a-ENSG00000108443	RPS6KB1	31684	European	Males and Females
eqtl-a-ENSG00000108576	SLC6A4	31684	European	Males and Females
eqtl-a-ENSG00000108924	HLF	31684	European	Males and Females
eqtl-a-ENSG00000109084	TMEM97	31684	European	Males and Females
eqtl-a-ENSG00000109099	PMP22	31684	European	Males and Females
eqtl-a-ENSG00000109819	PPARGC1A	31684	European	Males and Females
eqtl-a-ENSG00000109861	CTSC	31684	European	Males and Females
eqtl-a-ENSG00000110031	LPXN	31684	European	Males and Females
eqtl-a-ENSG00000110090	CPT1A	31684	European	Males and Females
eqtl-a-ENSG00000110092	CCND1	31684	European	Males and Females
eqtl-a-ENSG00000110497	AMBRA1	31684	European	Males and Females
eqtl-a-ENSG00000110911	SLC11A2	31684	European	Males and Females
eqtl-a-ENSG00000111142	METAP2	31684	European	Males and Females
eqtl-a-ENSG00000111653	ING4	31684	European	Males and Females
eqtl-a-ENSG00000111725	PRKAB1	31684	European	Males and Females
eqtl-a-ENSG00000112130	RNF8	31684	European	Males and Females
eqtl-a-ENSG00000112282	MED23	31684	European	Males and Females
eqtl-a-ENSG00000112531	QKI	31684	European	Males and Females
eqtl-a-ENSG00000112576	CCND3	31684	European	Males and Females
eqtl-a-ENSG00000112592	TBP	31684	European	Males and Females
eqtl-a-ENSG00000112655	PTK7	31684	European	Males and Females
eqtl-a-ENSG00000112984	KIF20A	31684	European	Males and Females
eqtl-a-ENSG00000112996	MRPS30	31684	European	Males and Females
eqtl-a-ENSG00000113140	SPARC	31684	European	Males and Females
eqtl-a-ENSG00000113296	THBS4	31684	European	Males and Females
eqtl-a-ENSG00000113580	NR3C1	31684	European	Males and Females
eqtl-a-ENSG00000113721	PDGFRB	31684	European	Males and Females
eqtl-a-ENSG00000113758	DBN1	31684	European	Males and Females
eqtl-a-ENSG00000114054	PCCB	31684	European	Males and Females
eqtl-a-ENSG00000114554	PLXNA1	31684	European	Males and Females
eqtl-a-ENSG00000115204	MPV17	31684	European	Males and Females
eqtl-a-ENSG00000115306	SPTBN1	31684	European	Males and Females
eqtl-a-ENSG00000115468	EFHD1	31684	European	Males and Females
eqtl-a-ENSG00000115594	IL1R1	31684	European	Males and Females
eqtl-a-ENSG00000115641	FHL2	31684	European	Males and Females
eqtl-a-ENSG00000115875	SRSF7	31684	European	Males and Females
eqtl-a-ENSG00000116044	NFE2L2	31684	European	Males and Females
eqtl-a-ENSG00000116157	GPX7	31684	European	Males and Females
eqtl-a-ENSG00000116670	MAD2L2	31684	European	Males and Females
eqtl-a-ENSG00000116701	NCF2	31684	European	Males and Females
eqtl-a-ENSG00000116830	TTF2	31684	European	Males and Females
eqtl-a-ENSG00000117118	SDHB	31684	European	Males and Females
eqtl-a-ENSG00000117174	ZNHIT6	31684	European	Males and Females
eqtl-a-ENSG00000117318	ID3	31684	European	Males and Females
eqtl-a-ENSG00000117448	AKR1A1	31684	European	Males and Females
eqtl-a-ENSG00000117479	SLC19A2	31684	European	Males and Females
eqtl-a-ENSG00000117480	FAAH	31684	European	Males and Females
eqtl-a-ENSG00000117632	STMN1	31684	European	Males and Females
eqtl-a-ENSG00000117676	RPS6KA1	31684	European	Males and Females
eqtl-a-ENSG00000117758	STX12	31684	European	Males and Females
eqtl-a-ENSG00000118217	ATF6	31684	European	Males and Females
eqtl-a-ENSG00000118503	TNFAIP3	31684	European	Males and Females
eqtl-a-ENSG00000118513	MYB	31684	European	Males and Females
eqtl-a-ENSG00000119812	FAM98A	31684	European	Males and Females
eqtl-a-ENSG00000120158	RCL1	31684	European	Males and Females
eqtl-a-ENSG00000120318	ARAP3	31684	European	Males and Females
eqtl-a-ENSG00000120738	EGR1	31684	European	Males and Females
eqtl-a-ENSG00000120868	APAF1	31684	European	Males and Females
eqtl-a-ENSG00000120875	DUSP4	31684	European	Males and Females
eqtl-a-ENSG00000122678	POLM	31684	European	Males and Females
eqtl-a-ENSG00000122729	ACO1	31684	European	Males and Females
eqtl-a-ENSG00000123104	ITPR2	31684	European	Males and Females
eqtl-a-ENSG00000123191	ATP7B	31684	European	Males and Females
eqtl-a-ENSG00000123358	NR4A1	31684	European	Males and Females
eqtl-a-ENSG00000123374	CDK2	31684	European	Males and Females
eqtl-a-ENSG00000123505	AMD1	31684	European	Males and Females
eqtl-a-ENSG00000124225	PMEPA1	31684	European	Males and Females
eqtl-a-ENSG00000124762	CDKN1A	31684	European	Males and Females
eqtl-a-ENSG00000124767	GLO1	31684	European	Males and Females
eqtl-a-ENSG00000125538	IL1B	31684	European	Males and Females
eqtl-a-ENSG00000126215	XRCC3	31684	European	Males and Females
eqtl-a-ENSG00000126351	THRA	31684	European	Males and Females
eqtl-a-ENSG00000126522	ASL	31684	European	Males and Females
eqtl-a-ENSG00000126581	BECN1	31684	European	Males and Females
eqtl-a-ENSG00000126775	ATG14	31684	European	Males and Females
eqtl-a-ENSG00000127616	SMARCA4	31684	European	Males and Females
eqtl-a-ENSG00000128039	SRD5A3	31684	European	Males and Females
eqtl-a-ENSG00000128829	EIF2AK4	31684	European	Males and Females
eqtl-a-ENSG00000128951	DUT	31684	European	Males and Females
eqtl-a-ENSG00000129244	ATP1B2	31684	European	Males and Females
eqtl-a-ENSG00000129473	BCL2L2	31684	European	Males and Females
eqtl-a-ENSG00000129521	EGLN3	31684	European	Males and Females
eqtl-a-ENSG00000130158	DOCK6	31684	European	Males and Females
eqtl-a-ENSG00000130382	MLLT1	31684	European	Males and Females
eqtl-a-ENSG00000130529	TRPM4	31684	European	Males and Females
eqtl-a-ENSG00000130635	COL5A1	31684	European	Males and Females
eqtl-a-ENSG00000130649	CYP2E1	31684	European	Males and Females
eqtl-a-ENSG00000130816	DNMT1	31684	European	Males and Females
eqtl-a-ENSG00000130935	NOL11	31684	European	Males and Females
eqtl-a-ENSG00000130940	CASZ1	31684	European	Males and Females
eqtl-a-ENSG00000130948	HSD17B3	31684	European	Males and Females
eqtl-a-ENSG00000131018	SYNE1	31684	European	Males and Females
eqtl-a-ENSG00000131323	TRAF3	31684	European	Males and Females
eqtl-a-ENSG00000131746	TNS4	31684	European	Males and Females
eqtl-a-ENSG00000131747	TOP2A	31684	European	Males and Females
eqtl-a-ENSG00000131778	CHD1L	31684	European	Males and Females
eqtl-a-ENSG00000131899	LLGL1	31684	European	Males and Females
eqtl-a-ENSG00000132170	PPARG	31684	European	Males and Females
eqtl-a-ENSG00000132326	PER2	31684	European	Males and Females
eqtl-a-ENSG00000132329	RAMP1	31684	European	Males and Females
eqtl-a-ENSG00000132382	MYBBP1A	31684	European	Males and Females
eqtl-a-ENSG00000132530	XAF1	31684	European	Males and Females
eqtl-a-ENSG00000132646	PCNA	31684	European	Males and Females
eqtl-a-ENSG00000132670	PTPRA	31684	European	Males and Females
eqtl-a-ENSG00000132681	ATP1A4	31684	European	Males and Females
eqtl-a-ENSG00000132740	IGHMBP2	31684	European	Males and Females
eqtl-a-ENSG00000132906	CASP9	31684	European	Males and Females
eqtl-a-ENSG00000132912	DCTN4	31684	European	Males and Females
eqtl-a-ENSG00000132932	ATP8A2	31684	European	Males and Females
eqtl-a-ENSG00000133027	PEMT	31684	European	Males and Females
eqtl-a-ENSG00000133313	CNDP2	31684	European	Males and Females
eqtl-a-ENSG00000134057	CCNB1	31684	European	Males and Females
eqtl-a-ENSG00000134324	LPIN1	31684	European	Males and Females
eqtl-a-ENSG00000134470	IL15RA	31684	European	Males and Females
eqtl-a-ENSG00000134516	DOCK2	31684	European	Males and Females
eqtl-a-ENSG00000134690	CDCA8	31684	European	Males and Females
eqtl-a-ENSG00000134987	WDR36	31684	European	Males and Females
eqtl-a-ENSG00000135318	NT5E	31684	European	Males and Females
eqtl-a-ENSG00000135439	AGAP2	31684	European	Males and Females
eqtl-a-ENSG00000135541	AHI1	31684	European	Males and Females
eqtl-a-ENSG00000135636	DYSF	31684	European	Males and Females
eqtl-a-ENSG00000135679	MDM2	31684	European	Males and Females
eqtl-a-ENSG00000135821	GLUL	31684	European	Males and Females
eqtl-a-ENSG00000135829	DHX9	31684	European	Males and Females
eqtl-a-ENSG00000135862	LAMC1	31684	European	Males and Females
eqtl-a-ENSG00000135913	USP37	31684	European	Males and Females
eqtl-a-ENSG00000135929	CYP27A1	31684	European	Males and Females
eqtl-a-ENSG00000136026	CKAP4	31684	European	Males and Females
eqtl-a-ENSG00000136848	DAB2IP	31684	European	Males and Females
eqtl-a-ENSG00000136869	TLR4	31684	European	Males and Females
eqtl-a-ENSG00000136891	TEX10	31684	European	Males and Females
eqtl-a-ENSG00000137841	PLCB2	31684	European	Males and Females
eqtl-a-ENSG00000137992	DBT	31684	European	Males and Females
eqtl-a-ENSG00000138061	CYP1B1	31684	European	Males and Females
eqtl-a-ENSG00000138303	ASCC1	31684	European	Males and Females
eqtl-a-ENSG00000138336	TET1	31684	European	Males and Females
eqtl-a-ENSG00000138798	EGF	31684	European	Males and Females
eqtl-a-ENSG00000139318	DUSP6	31684	European	Males and Females
eqtl-a-ENSG00000140968	IRF8	31684	European	Males and Females
eqtl-a-ENSG00000141499	WRAP53	31684	European	Males and Females
eqtl-a-ENSG00000141510	TP53	31684	European	Males and Females
eqtl-a-ENSG00000141582	CBX4	31684	European	Males and Females
eqtl-a-ENSG00000141867	BRD4	31684	European	Males and Females
eqtl-a-ENSG00000142002	DPP9	31684	European	Males and Females
eqtl-a-ENSG00000142082	SIRT3	31684	European	Males and Females
eqtl-a-ENSG00000142541	RPL13A	31684	European	Males and Females
eqtl-a-ENSG00000143179	UCK2	31684	European	Males and Females
eqtl-a-ENSG00000143183	TMCO1	31684	European	Males and Females
eqtl-a-ENSG00000143228	NUF2	31684	European	Males and Females
eqtl-a-ENSG00000143387	CTSK	31684	European	Males and Females
eqtl-a-ENSG00000143442	POGZ	31684	European	Males and Females
eqtl-a-ENSG00000143776	CDC42BPA	31684	European	Males and Females
eqtl-a-ENSG00000143799	PARP1	31684	European	Males and Females
eqtl-a-ENSG00000143819	EPHX1	31684	European	Males and Females
eqtl-a-ENSG00000144935	TRPC1	31684	European	Males and Females
eqtl-a-ENSG00000145386	CCNA2	31684	European	Males and Females
eqtl-a-ENSG00000145604	SKP2	31684	European	Males and Females
eqtl-a-ENSG00000145675	PIK3R1	31684	European	Males and Females
eqtl-a-ENSG00000145687	SSBP2	31684	European	Males and Females
eqtl-a-ENSG00000147316	MCPH1	31684	European	Males and Females
eqtl-a-ENSG00000147437	GNRH1	31684	European	Males and Females
eqtl-a-ENSG00000147548	NSD3	31684	European	Males and Females
eqtl-a-ENSG00000148180	GSN	31684	European	Males and Females
eqtl-a-ENSG00000148219	ASTN2	31684	European	Males and Females
eqtl-a-ENSG00000148773	MKI67	31684	European	Males and Females
eqtl-a-ENSG00000149294	NCAM1	31684	European	Males and Females
eqtl-a-ENSG00000149485	FADS1	31684	European	Males and Females
eqtl-a-ENSG00000149532	CPSF7	31684	European	Males and Females
eqtl-a-ENSG00000149716	LTO1	31684	European	Males and Females
eqtl-a-ENSG00000150760	DOCK1	31684	European	Males and Females
eqtl-a-ENSG00000151012	SLC7A11	31684	European	Males and Females
eqtl-a-ENSG00000151702	FLI1	31684	European	Males and Females
eqtl-a-ENSG00000152234	ATP5F1A	31684	European	Males and Females
eqtl-a-ENSG00000152422	XRCC4	31684	European	Males and Females
eqtl-a-ENSG00000153207	AHCTF1	31684	European	Males and Females
eqtl-a-ENSG00000153814	JAZF1	31684	European	Males and Females
eqtl-a-ENSG00000154229	PRKCA	31684	European	Males and Females
eqtl-a-ENSG00000154358	OBSCN	31684	European	Males and Females
eqtl-a-ENSG00000154473	BUB3	31684	European	Males and Females
eqtl-a-ENSG00000156299	TIAM1	31684	European	Males and Females
eqtl-a-ENSG00000156475	PPP2R2B	31684	European	Males and Females
eqtl-a-ENSG00000156515	HK1	31684	European	Males and Females
eqtl-a-ENSG00000156804	FBXO32	31684	European	Males and Females
eqtl-a-ENSG00000157077	ZFYVE9	31684	European	Males and Females
eqtl-a-ENSG00000157554	ERG	31684	European	Males and Females
eqtl-a-ENSG00000158715	SLC45A3	31684	European	Males and Females
eqtl-a-ENSG00000158773	USF1	31684	European	Males and Females
eqtl-a-ENSG00000158828	PINK1	31684	European	Males and Females
eqtl-a-ENSG00000159128	IFNGR2	31684	European	Males and Females
eqtl-a-ENSG00000159640	ACE	31684	European	Males and Females
eqtl-a-ENSG00000160213	CSTB	31684	European	Males and Females
eqtl-a-ENSG00000160221	GATD3	31684	European	Males and Females
eqtl-a-ENSG00000160271	RALGDS	31684	European	Males and Females
eqtl-a-ENSG00000160294	MCM3AP	31684	European	Males and Females
eqtl-a-ENSG00000160688	FLAD1	31684	European	Males and Females
eqtl-a-ENSG00000161013	MGAT4B	31684	European	Males and Females
eqtl-a-ENSG00000161036	LRWD1	31684	European	Males and Females
eqtl-a-ENSG00000161533	ACOX1	31684	European	Males and Females
eqtl-a-ENSG00000162676	GFI1	31684	European	Males and Females
eqtl-a-ENSG00000162711	NLRP3	31684	European	Males and Females
eqtl-a-ENSG00000162734	PEA15	31684	European	Males and Females
eqtl-a-ENSG00000162736	NCSTN	31684	European	Males and Females
eqtl-a-ENSG00000163002	NUP35	31684	European	Males and Females
eqtl-a-ENSG00000163104	SMARCAD1	31684	European	Males and Females
eqtl-a-ENSG00000163131	CTSS	31684	European	Males and Females
eqtl-a-ENSG00000163297	ANTXR2	31684	European	Males and Females
eqtl-a-ENSG00000163359	COL6A3	31684	European	Males and Females
eqtl-a-ENSG00000163468	CCT3	31684	European	Males and Females
eqtl-a-ENSG00000163682	RPL9	31684	European	Males and Females
eqtl-a-ENSG00000163781	TOPBP1	31684	European	Males and Females
eqtl-a-ENSG00000163823	CCR1	31684	European	Males and Females
eqtl-a-ENSG00000163840	DTX3L	31684	European	Males and Females
eqtl-a-ENSG00000164045	CDC25A	31684	European	Males and Females
eqtl-a-ENSG00000164111	ANXA5	31684	European	Males and Females
eqtl-a-ENSG00000164171	ITGA2	31684	European	Males and Females
eqtl-a-ENSG00000164305	CASP3	31684	European	Males and Females
eqtl-a-ENSG00000164330	EBF1	31684	European	Males and Females
eqtl-a-ENSG00000164867	NOS3	31684	European	Males and Females
eqtl-a-ENSG00000164919	COX6C	31684	European	Males and Females
eqtl-a-ENSG00000165209	STRBP	31684	European	Males and Females
eqtl-a-ENSG00000165392	WRN	31684	European	Males and Females
eqtl-a-ENSG00000165409	TSHR	31684	European	Males and Females
eqtl-a-ENSG00000165480	SKA3	31684	European	Males and Females
eqtl-a-ENSG00000165731	RET	31684	European	Males and Females
eqtl-a-ENSG00000165879	FRAT1	31684	European	Males and Females
eqtl-a-ENSG00000166135	HIF1AN	31684	European	Males and Females
eqtl-a-ENSG00000166165	CKB	31684	European	Males and Females
eqtl-a-ENSG00000166347	CYB5A	31684	European	Males and Females
eqtl-a-ENSG00000166484	MAPK7	31684	European	Males and Females
eqtl-a-ENSG00000166501	PRKCB	31684	European	Males and Females
eqtl-a-ENSG00000166508	MCM7	31684	European	Males and Females
eqtl-a-ENSG00000167136	ENDOG	31684	European	Males and Females
eqtl-a-ENSG00000167257	RNF214	31684	European	Males and Females
eqtl-a-ENSG00000167434	CA4	31684	European	Males and Females
eqtl-a-ENSG00000167658	EEF2	31684	European	Males and Females
eqtl-a-ENSG00000167701	GPT	31684	European	Males and Females
eqtl-a-ENSG00000167815	PRDX2	31684	European	Males and Females
eqtl-a-ENSG00000168209	DDIT4	31684	European	Males and Females
eqtl-a-ENSG00000168811	IL12A	31684	European	Males and Females
eqtl-a-ENSG00000169047	IRS1	31684	European	Males and Females
eqtl-a-ENSG00000169398	PTK2	31684	European	Males and Females
eqtl-a-ENSG00000169607	CKAP2L	31684	European	Males and Females
eqtl-a-ENSG00000169855	ROBO1	31684	European	Males and Females
eqtl-a-ENSG00000169896	ITGAM	31684	European	Males and Females
eqtl-a-ENSG00000170312	CDK1	31684	European	Males and Females
eqtl-a-ENSG00000170345	FOS	31684	European	Males and Females
eqtl-a-ENSG00000170606	HSPA4	31684	European	Males and Females
eqtl-a-ENSG00000171310	CHST11	31684	European	Males and Females
eqtl-a-ENSG00000171408	PDE7B	31684	European	Males and Females
eqtl-a-ENSG00000171453	POLR1C	31684	European	Males and Females
eqtl-a-ENSG00000171552	BCL2L1	31684	European	Males and Females
eqtl-a-ENSG00000171824	EXOSC10	31684	European	Males and Females
eqtl-a-ENSG00000171867	PRNP	31684	European	Males and Females
eqtl-a-ENSG00000171914	TLN2	31684	European	Males and Females
eqtl-a-ENSG00000172216	CEBPB	31684	European	Males and Females
eqtl-a-ENSG00000172270	BSG	31684	European	Males and Females
eqtl-a-ENSG00000172349	IL16	31684	European	Males and Females
eqtl-a-ENSG00000173039	RELA	31684	European	Males and Females
eqtl-a-ENSG00000173230	GOLGB1	31684	European	Males and Females
eqtl-a-ENSG00000173273	TNKS	31684	European	Males and Females
eqtl-a-ENSG00000173391	OLR1	31684	European	Males and Females
eqtl-a-ENSG00000174371	EXO1	31684	European	Males and Females
eqtl-a-ENSG00000174437	ATP2A2	31684	European	Males and Females
eqtl-a-ENSG00000174469	CNTNAP2	31684	European	Males and Females
eqtl-a-ENSG00000175130	MARCKSL1	31684	European	Males and Females
eqtl-a-ENSG00000175197	DDIT3	31684	European	Males and Females
eqtl-a-ENSG00000175216	CKAP5	31684	European	Males and Females
eqtl-a-ENSG00000175305	CCNE2	31684	European	Males and Females
eqtl-a-ENSG00000175445	LPL	31684	European	Males and Females
eqtl-a-ENSG00000175567	UCP2	31684	European	Males and Females
eqtl-a-ENSG00000176890	TYMS	31684	European	Males and Females
eqtl-a-ENSG00000178105	DDX10	31684	European	Males and Females
eqtl-a-ENSG00000178607	ERN1	31684	European	Males and Females
eqtl-a-ENSG00000179242	CDH4	31684	European	Males and Females
eqtl-a-ENSG00000179409	GEMIN4	31684	European	Males and Females
eqtl-a-ENSG00000180530	NRIP1	31684	European	Males and Females
eqtl-a-ENSG00000181019	NQO1	31684	European	Males and Females
eqtl-a-ENSG00000181610	MRPS23	31684	European	Males and Females
eqtl-a-ENSG00000182580	EPHB3	31684	European	Males and Females
eqtl-a-ENSG00000182732	RGS6	31684	European	Males and Females
eqtl-a-ENSG00000182871	COL18A1	31684	European	Males and Females
eqtl-a-ENSG00000183765	CHEK2	31684	European	Males and Females
eqtl-a-ENSG00000184349	EFNA5	31684	European	Males and Females
eqtl-a-ENSG00000184445	KNTC1	31684	European	Males and Females
eqtl-a-ENSG00000185345	PRKN	31684	European	Males and Females
eqtl-a-ENSG00000185504	FAAP100	31684	European	Males and Females
eqtl-a-ENSG00000185630	PBX1	31684	European	Males and Females
eqtl-a-ENSG00000185736	ADARB2	31684	European	Males and Females
eqtl-a-ENSG00000185885	IFITM1	31684	European	Males and Females
eqtl-a-ENSG00000186174	BCL9L	31684	European	Males and Females
eqtl-a-ENSG00000186716	BCR	31684	European	Males and Females
eqtl-a-ENSG00000189067	LITAF	31684	European	Males and Females
eqtl-a-ENSG00000189091	SF3B3	31684	European	Males and Females
eqtl-a-ENSG00000196396	PTPN1	31684	European	Males and Females
eqtl-a-ENSG00000196569	LAMA2	31684	European	Males and Females
eqtl-a-ENSG00000196878	LAMB3	31684	European	Males and Females
eqtl-a-ENSG00000196935	SRGAP1	31684	European	Males and Females
eqtl-a-ENSG00000197299	BLM	31684	European	Males and Females
eqtl-a-ENSG00000197321	SVIL	31684	European	Males and Females
eqtl-a-ENSG00000197548	ATG7	31684	European	Males and Females
eqtl-a-ENSG00000197561	ELANE	31684	European	Males and Females
eqtl-a-ENSG00000197594	ENPP1	31684	European	Males and Females
eqtl-a-ENSG00000197930	ERO1A	31684	European	Males and Females
eqtl-a-ENSG00000198121	LPAR1	31684	European	Males and Females
eqtl-a-ENSG00000198369	SPRED2	31684	European	Males and Females
eqtl-a-ENSG00000198373	WWP2	31684	European	Males and Females
eqtl-a-ENSG00000198554	WDHD1	31684	European	Males and Females
eqtl-a-ENSG00000198586	TLK1	31684	European	Males and Females
eqtl-a-ENSG00000198604	BAZ1A	31684	European	Males and Females
eqtl-a-ENSG00000198646	NCOA6	31684	European	Males and Females
eqtl-a-ENSG00000198719	DLL1	31684	European	Males and Females
eqtl-a-ENSG00000198846	TOX	31684	European	Males and Females
eqtl-a-ENSG00000204842	ATXN2	31684	European	Males and Females
eqtl-a-ENSG00000211445	GPX3	31684	European	Males and Females
eqtl-a-ENSG00000213024	NUP62	31684	European	Males and Females
eqtl-a-ENSG00000213341	CHUK	31684	European	Males and Females
eqtl-a-ENSG00000213463	SYNJ2BP	31684	European	Males and Females
eqtl-a-ENSG00000239306	RBM14	31684	European	Males and Females
eqtl-a-ENSG00000240583	AQP1	31684	European	Males and Females
eqtl-a-ENSG00000000971	CFH	31644	European	Males and Females
eqtl-a-ENSG00000001084	GCLC	31644	European	Males and Females
eqtl-a-ENSG00000034713	GABARAPL2	31644	European	Males and Females
eqtl-a-ENSG00000044115	CTNNA1	31644	European	Males and Females
eqtl-a-ENSG00000053254	FOXN3	31644	European	Males and Females
eqtl-a-ENSG00000056558	TRAF1	31644	European	Males and Females
eqtl-a-ENSG00000070961	ATP2B1	31644	European	Males and Females
eqtl-a-ENSG00000074590	NUAK1	31644	European	Males and Females
eqtl-a-ENSG00000075415	SLC25A3	31644	European	Males and Females
eqtl-a-ENSG00000078140	UBE2K	31644	European	Males and Females
eqtl-a-ENSG00000078177	N4BP2	31644	European	Males and Females
eqtl-a-ENSG00000080824	HSP90AA1	31644	European	Males and Females
eqtl-a-ENSG00000082781	ITGB5	31644	European	Males and Females
eqtl-a-ENSG00000087299	L2HGDH	31644	European	Males and Females
eqtl-a-ENSG00000104267	CA2	31644	European	Males and Females
eqtl-a-ENSG00000104365	IKBKB	31644	European	Males and Females
eqtl-a-ENSG00000104687	GSR	31644	European	Males and Females
eqtl-a-ENSG00000105854	PON2	31644	European	Males and Females
eqtl-a-ENSG00000111728	ST8SIA1	31644	European	Males and Females
eqtl-a-ENSG00000119487	MAPKAP1	31644	European	Males and Females
eqtl-a-ENSG00000120913	PDLIM2	31644	European	Males and Females
eqtl-a-ENSG00000121741	ZMYM2	31644	European	Males and Females
eqtl-a-ENSG00000122679	RAMP3	31644	European	Males and Females
eqtl-a-ENSG00000133800	LYVE1	31644	European	Males and Females
eqtl-a-ENSG00000134480	CCNH	31644	European	Males and Females
eqtl-a-ENSG00000136634	IL10	31644	European	Males and Females
eqtl-a-ENSG00000153234	NR4A2	31644	European	Males and Females
eqtl-a-ENSG00000162924	REL	31644	European	Males and Females
eqtl-a-ENSG00000163235	TGFA	31644	European	Males and Females
eqtl-a-ENSG00000163568	AIM2	31644	European	Males and Females
eqtl-a-ENSG00000164283	ESM1	31644	European	Males and Females
eqtl-a-ENSG00000168310	IRF2	31644	European	Males and Females
eqtl-a-ENSG00000169184	MN1	31644	European	Males and Females
eqtl-a-ENSG00000171791	BCL2	31644	European	Males and Females
eqtl-a-ENSG00000172493	AFF1	31644	European	Males and Females
eqtl-a-ENSG00000173744	AGFG1	31644	European	Males and Females
eqtl-a-ENSG00000181104	F2R	31644	European	Males and Females
eqtl-a-ENSG00000198176	TFDP1	31644	European	Males and Females
eqtl-a-ENSG00000088002	SULT2B1	31493	European	Males and Females
eqtl-a-ENSG00000108821	COL1A1	31493	European	Males and Females
eqtl-a-ENSG00000006831	ADIPOR2	31470	European	Males and Females
eqtl-a-ENSG00000008226	DLEC1	31470	European	Males and Females
eqtl-a-ENSG00000010278	CD9	31470	European	Males and Females
eqtl-a-ENSG00000012171	SEMA3B	31470	European	Males and Females
eqtl-a-ENSG00000028277	POU2F2	31470	European	Males and Females
eqtl-a-ENSG00000035928	RFC1	31470	European	Males and Females
eqtl-a-ENSG00000050628	PTGER3	31470	European	Males and Females
eqtl-a-ENSG00000057663	ATG5	31470	European	Males and Females
eqtl-a-ENSG00000058668	ATP2B4	31470	European	Males and Females
eqtl-a-ENSG00000059728	MXD1	31470	European	Males and Females
eqtl-a-ENSG00000064012	CASP8	31470	European	Males and Females
eqtl-a-ENSG00000065328	MCM10	31470	European	Males and Females
eqtl-a-ENSG00000065883	CDK13	31470	European	Males and Females
eqtl-a-ENSG00000067369	TP53BP1	31470	European	Males and Females
eqtl-a-ENSG00000067955	CBFB	31470	European	Males and Females
eqtl-a-ENSG00000070019	GUCY2C	31470	European	Males and Females
eqtl-a-ENSG00000071967	CYBRD1	31470	European	Males and Females
eqtl-a-ENSG00000072682	P4HA2	31470	European	Males and Females
eqtl-a-ENSG00000073060	SCARB1	31470	European	Males and Females
eqtl-a-ENSG00000073578	SDHA	31470	European	Males and Females
eqtl-a-ENSG00000073756	PTGS2	31470	European	Males and Females
eqtl-a-ENSG00000074370	ATP2A3	31470	European	Males and Females
eqtl-a-ENSG00000079246	XRCC5	31470	European	Males and Females
eqtl-a-ENSG00000079999	KEAP1	31470	European	Males and Females
eqtl-a-ENSG00000080345	RIF1	31470	European	Males and Females
eqtl-a-ENSG00000083799	CYLD	31470	European	Males and Females
eqtl-a-ENSG00000085978	ATG16L1	31470	European	Males and Females
eqtl-a-ENSG00000087088	BAX	31470	European	Males and Females
eqtl-a-ENSG00000091732	ZC3HC1	31470	European	Males and Females
eqtl-a-ENSG00000093009	CDC45	31470	European	Males and Females
eqtl-a-ENSG00000095321	CRAT	31470	European	Males and Females
eqtl-a-ENSG00000100219	XBP1	31470	European	Males and Females
eqtl-a-ENSG00000100650	SRSF5	31470	European	Males and Females
eqtl-a-ENSG00000101210	EEF1A2	31470	European	Males and Females
eqtl-a-ENSG00000101361	NOP56	31470	European	Males and Females
eqtl-a-ENSG00000101412	E2F1	31470	European	Males and Females
eqtl-a-ENSG00000102882	MAPK3	31470	European	Males and Females
eqtl-a-ENSG00000103490	PYCARD	31470	European	Males and Females
eqtl-a-ENSG00000104147	OIP5	31470	European	Males and Females
eqtl-a-ENSG00000104450	SPAG1	31470	European	Males and Females
eqtl-a-ENSG00000104529	EEF1D	31470	European	Males and Females
eqtl-a-ENSG00000105173	CCNE1	31470	European	Males and Females
eqtl-a-ENSG00000105220	GPI	31470	European	Males and Females
eqtl-a-ENSG00000105974	CAV1	31470	European	Males and Females
eqtl-a-ENSG00000106100	NOD1	31470	European	Males and Females
eqtl-a-ENSG00000106459	NRF1	31470	European	Males and Females
eqtl-a-ENSG00000106546	AHR	31470	European	Males and Females
eqtl-a-ENSG00000106617	PRKAG2	31470	European	Males and Females
eqtl-a-ENSG00000107282	APBA1	31470	European	Males and Females
eqtl-a-ENSG00000107731	UNC5B	31470	European	Males and Females
eqtl-a-ENSG00000108679	LGALS3BP	31470	European	Males and Females
eqtl-a-ENSG00000108953	YWHAE	31470	European	Males and Females
eqtl-a-ENSG00000108984	MAP2K6	31470	European	Males and Females
eqtl-a-ENSG00000109452	INPP4B	31470	European	Males and Females
eqtl-a-ENSG00000110321	EIF4G2	31470	European	Males and Females
eqtl-a-ENSG00000110492	MDK	31470	European	Males and Females
eqtl-a-ENSG00000110514	MADD	31470	European	Males and Females
eqtl-a-ENSG00000110876	SELPLG	31470	European	Males and Females
eqtl-a-ENSG00000111537	IFNG	31470	European	Males and Females
eqtl-a-ENSG00000112182	BACH2	31470	European	Males and Females
eqtl-a-ENSG00000112715	VEGFA	31470	European	Males and Females
eqtl-a-ENSG00000113231	PDE8B	31470	European	Males and Females
eqtl-a-ENSG00000113369	ARRDC3	31470	European	Males and Females
eqtl-a-ENSG00000114767	RRP9	31470	European	Males and Females
eqtl-a-ENSG00000114948	ADAM23	31470	European	Males and Females
eqtl-a-ENSG00000115138	POMC	31470	European	Males and Females
eqtl-a-ENSG00000115241	PPM1G	31470	European	Males and Females
eqtl-a-ENSG00000115392	FANCL	31470	European	Males and Females
eqtl-a-ENSG00000115419	GLS	31470	European	Males and Females
eqtl-a-ENSG00000115602	IL1RL1	31470	European	Males and Females
eqtl-a-ENSG00000116001	TIA1	31470	European	Males and Females
eqtl-a-ENSG00000116016	EPAS1	31470	European	Males and Females
eqtl-a-ENSG00000116717	GADD45A	31470	European	Males and Females
eqtl-a-ENSG00000116729	WLS	31470	European	Males and Females
eqtl-a-ENSG00000116741	RGS2	31470	European	Males and Females
eqtl-a-ENSG00000117394	SLC2A1	31470	European	Males and Females
eqtl-a-ENSG00000117450	PRDX1	31470	European	Males and Females
eqtl-a-ENSG00000117595	IRF6	31470	European	Males and Females
eqtl-a-ENSG00000118523	CCN2	31470	European	Males and Females
eqtl-a-ENSG00000118971	CCND2	31470	European	Males and Females
eqtl-a-ENSG00000119969	HELLS	31470	European	Males and Females
eqtl-a-ENSG00000121966	CXCR4	31470	European	Males and Females
eqtl-a-ENSG00000122966	CIT	31470	European	Males and Females
eqtl-a-ENSG00000123352	SPATS2	31470	European	Males and Females
eqtl-a-ENSG00000124145	SDC4	31470	European	Males and Females
eqtl-a-ENSG00000125148	MT2A	31470	European	Males and Females
eqtl-a-ENSG00000125733	TRIP10	31470	European	Males and Females
eqtl-a-ENSG00000126777	KTN1	31470	European	Males and Females
eqtl-a-ENSG00000127564	PKMYT1	31470	European	Males and Females
eqtl-a-ENSG00000128271	ADORA2A	31470	European	Males and Females
eqtl-a-ENSG00000128791	TWSG1	31470	European	Males and Females
eqtl-a-ENSG00000130164	LDLR	31470	European	Males and Females
eqtl-a-ENSG00000131196	NFATC1	31470	European	Males and Females
eqtl-a-ENSG00000131711	MAP1B	31470	European	Males and Females
eqtl-a-ENSG00000132386	SERPINF1	31470	European	Males and Females
eqtl-a-ENSG00000132600	PRMT7	31470	European	Males and Females
eqtl-a-ENSG00000133216	EPHB2	31470	European	Males and Females
eqtl-a-ENSG00000133422	MORC2	31470	European	Males and Females
eqtl-a-ENSG00000133961	NUMB	31470	European	Males and Females
eqtl-a-ENSG00000134504	KCTD1	31470	European	Males and Females
eqtl-a-ENSG00000135046	ANXA1	31470	European	Males and Females
eqtl-a-ENSG00000135547	HEY2	31470	European	Males and Females
eqtl-a-ENSG00000136040	PLXNC1	31470	European	Males and Females
eqtl-a-ENSG00000136273	HUS1	31470	European	Males and Females
eqtl-a-ENSG00000137193	PIM1	31470	European	Males and Females
eqtl-a-ENSG00000137486	ARRB1	31470	European	Males and Females
eqtl-a-ENSG00000137752	CASP1	31470	European	Males and Females
eqtl-a-ENSG00000138449	SLC40A1	31470	European	Males and Females
eqtl-a-ENSG00000138668	HNRNPD	31470	European	Males and Females
eqtl-a-ENSG00000138795	LEF1	31470	European	Males and Females
eqtl-a-ENSG00000139734	DIAPH3	31470	European	Males and Females
eqtl-a-ENSG00000140009	ESR2	31470	European	Males and Females
eqtl-a-ENSG00000140451	PIF1	31470	European	Males and Females
eqtl-a-ENSG00000140521	POLG	31470	European	Males and Females
eqtl-a-ENSG00000141378	PTRH2	31470	European	Males and Females
eqtl-a-ENSG00000141526	SLC16A3	31470	European	Males and Females
eqtl-a-ENSG00000141905	NFIC	31470	European	Males and Females
eqtl-a-ENSG00000142192	APP	31470	European	Males and Females
eqtl-a-ENSG00000143153	ATP1B1	31470	European	Males and Females
eqtl-a-ENSG00000143437	ARNT	31470	European	Males and Females
eqtl-a-ENSG00000143476	DTL	31470	European	Males and Females
eqtl-a-ENSG00000143669	LYST	31470	European	Males and Females
eqtl-a-ENSG00000144713	RPL32	31470	European	Males and Females
eqtl-a-ENSG00000146834	MEPCE	31470	European	Males and Females
eqtl-a-ENSG00000148660	CAMK2G	31470	European	Males and Females
eqtl-a-ENSG00000148834	GSTO1	31470	European	Males and Females
eqtl-a-ENSG00000149308	NPAT	31470	European	Males and Females
eqtl-a-ENSG00000149503	INCENP	31470	European	Males and Females
eqtl-a-ENSG00000151150	ANK3	31470	European	Males and Females
eqtl-a-ENSG00000151623	NR3C2	31470	European	Males and Females
eqtl-a-ENSG00000152348	ATG10	31470	European	Males and Females
eqtl-a-ENSG00000152767	FARP1	31470	European	Males and Females
eqtl-a-ENSG00000155657	TTN	31470	European	Males and Females
eqtl-a-ENSG00000157540	DYRK1A	31470	European	Males and Females
eqtl-a-ENSG00000157557	ETS2	31470	European	Males and Females
eqtl-a-ENSG00000159140	SON	31470	European	Males and Females
eqtl-a-ENSG00000159840	ZYX	31470	European	Males and Females
eqtl-a-ENSG00000160145	KALRN	31470	European	Males and Females
eqtl-a-ENSG00000160469	BRSK1	31470	European	Males and Females
eqtl-a-ENSG00000161011	SQSTM1	31470	European	Males and Females
eqtl-a-ENSG00000161202	DVL3	31470	European	Males and Females
eqtl-a-ENSG00000162772	ATF3	31470	European	Males and Females
eqtl-a-ENSG00000163220	S100A9	31470	European	Males and Females
eqtl-a-ENSG00000163399	ATP1A1	31470	European	Males and Females
eqtl-a-ENSG00000163453	IGFBP7	31470	European	Males and Females
eqtl-a-ENSG00000163629	PTPN13	31470	European	Males and Females
eqtl-a-ENSG00000163848	ZNF148	31470	European	Males and Females
eqtl-a-ENSG00000164199	ADGRV1	31470	European	Males and Females
eqtl-a-ENSG00000165699	TSC1	31470	European	Males and Females
eqtl-a-ENSG00000165949	IFI27	31470	European	Males and Females
eqtl-a-ENSG00000166197	NOLC1	31470	European	Males and Females
eqtl-a-ENSG00000167306	MYO5B	31470	European	Males and Females
eqtl-a-ENSG00000167468	GPX4	31470	European	Males and Females
eqtl-a-ENSG00000168496	FEN1	31470	European	Males and Females
eqtl-a-ENSG00000168610	STAT3	31470	European	Males and Females
eqtl-a-ENSG00000169217	CD2BP2	31470	European	Males and Females
eqtl-a-ENSG00000170004	CHD3	31470	European	Males and Females
eqtl-a-ENSG00000171132	PRKCE	31470	European	Males and Females
eqtl-a-ENSG00000171223	JUNB	31470	European	Males and Females
eqtl-a-ENSG00000175063	UBE2C	31470	European	Males and Females
eqtl-a-ENSG00000175224	ATG13	31470	European	Males and Females
eqtl-a-ENSG00000175334	BANF1	31470	European	Males and Females
eqtl-a-ENSG00000175806	MSRA	31470	European	Males and Females
eqtl-a-ENSG00000177169	ULK1	31470	European	Males and Females
eqtl-a-ENSG00000177542	SLC25A22	31470	European	Males and Females
eqtl-a-ENSG00000177606	JUN	31470	European	Males and Females
eqtl-a-ENSG00000178921	PFAS	31470	European	Males and Females
eqtl-a-ENSG00000179388	EGR3	31470	European	Males and Females
eqtl-a-ENSG00000182866	LCK	31470	European	Males and Females
eqtl-a-ENSG00000183813	CCR4	31470	European	Males and Females
eqtl-a-ENSG00000183856	IQGAP3	31470	European	Males and Females
eqtl-a-ENSG00000184916	JAG2	31470	European	Males and Females
eqtl-a-ENSG00000186951	PPARA	31470	European	Males and Females
eqtl-a-ENSG00000189403	HMGB1	31470	European	Males and Females
eqtl-a-ENSG00000196218	RYR1	31470	European	Males and Females
eqtl-a-ENSG00000196455	PIK3R4	31470	European	Males and Females
eqtl-a-ENSG00000196498	NCOR2	31470	European	Males and Females
eqtl-a-ENSG00000197555	SIPA1L1	31470	European	Males and Females
eqtl-a-ENSG00000198805	PNP	31470	European	Males and Females
eqtl-a-ENSG00000198911	SREBF2	31470	European	Males and Females
eqtl-a-ENSG00000205413	SAMD9	31470	European	Males and Females
eqtl-a-ENSG00000221829	FANCG	31470	European	Males and Females
eqtl-a-ENSG00000248099	INSL3	31470	European	Males and Females
eqtl-a-ENSG00000049246	PER3	31430	European	Males and Females
eqtl-a-ENSG00000101665	SMAD7	31430	European	Males and Females
eqtl-a-ENSG00000134765	DSC1	31430	European	Males and Females
eqtl-a-ENSG00000151491	EPS8	31430	European	Males and Females
eqtl-a-ENSG00000158710	TAGLN2	31430	European	Males and Females
eqtl-a-ENSG00000004864	SLC25A13	31300	European	Males and Females
eqtl-a-ENSG00000050555	LAMC3	31300	European	Males and Females
eqtl-a-ENSG00000116133	DHCR24	31300	European	Males and Females
eqtl-a-ENSG00000120885	CLU	31300	European	Males and Females
eqtl-a-ENSG00000134202	GSTM3	31300	European	Males and Females
eqtl-a-ENSG00000136235	GPNMB	31300	European	Males and Females
eqtl-a-ENSG00000139116	KIF21A	31300	European	Males and Females
eqtl-a-ENSG00000139546	TARBP2	31300	European	Males and Females
eqtl-a-ENSG00000153395	LPCAT1	31300	European	Males and Females
eqtl-a-ENSG00000168078	PBK	31300	European	Males and Females
eqtl-a-ENSG00000105707	HPN	31279	European	Males and Females
eqtl-a-ENSG00000125257	ABCC4	31260	European	Males and Females
eqtl-a-ENSG00000064393	HIPK2	31256	European	Males and Females
eqtl-a-ENSG00000072195	SPEG	31256	European	Males and Females
eqtl-a-ENSG00000088256	GNA11	31256	European	Males and Females
eqtl-a-ENSG00000101596	SMCHD1	31256	European	Males and Females
eqtl-a-ENSG00000107643	MAPK8	31256	European	Males and Females
eqtl-a-ENSG00000109971	HSPA8	31256	European	Males and Females
eqtl-a-ENSG00000113441	LNPEP	31256	European	Males and Females
eqtl-a-ENSG00000117020	AKT3	31256	European	Males and Females
eqtl-a-ENSG00000145012	LPP	31256	European	Males and Females
eqtl-a-ENSG00000155393	HEATR3	31256	European	Males and Females
eqtl-a-ENSG00000163590	PPM1L	31256	European	Males and Females
eqtl-a-ENSG00000173801	JUP	31186	European	Males and Females
eqtl-a-ENSG00000140945	CDH13	31176	European	Males and Females
eqtl-a-ENSG00000148795	CYP17A1	31176	European	Males and Females
eqtl-a-ENSG00000183117	CSMD1	31132	European	Males and Females
eqtl-a-ENSG00000087085	ACHE	31086	European	Males and Females
eqtl-a-ENSG00000130513	GDF15	31086	European	Males and Females
eqtl-a-ENSG00000156113	KCNMA1	31086	European	Males and Females
eqtl-a-ENSG00000151778	SERP2	31050	European	Males and Females
eqtl-a-ENSG00000007372	PAX6	30962	European	Males and Females
eqtl-a-ENSG00000008441	NFIX	30935	European	Males and Females
eqtl-a-ENSG00000026103	FAS	30935	European	Males and Females
eqtl-a-ENSG00000088808	PPP1R13B	30935	European	Males and Females
eqtl-a-ENSG00000099250	NRP1	30935	European	Males and Females
eqtl-a-ENSG00000102554	KLF5	30935	European	Males and Females
eqtl-a-ENSG00000107331	ABCA2	30935	European	Males and Females
eqtl-a-ENSG00000108175	ZMIZ1	30935	European	Males and Females
eqtl-a-ENSG00000109320	NFKB1	30935	European	Males and Females
eqtl-a-ENSG00000118432	CNR1	30935	European	Males and Females
eqtl-a-ENSG00000123415	SMUG1	30935	European	Males and Females
eqtl-a-ENSG00000124882	EREG	30935	European	Males and Females
eqtl-a-ENSG00000128928	IVD	30935	European	Males and Females
eqtl-a-ENSG00000129465	RIPK3	30935	European	Males and Females
eqtl-a-ENSG00000131153	GINS2	30935	European	Males and Females
eqtl-a-ENSG00000134489	HRH4	30935	European	Males and Females
eqtl-a-ENSG00000143549	TPM3	30935	European	Males and Females
eqtl-a-ENSG00000145335	SNCA	30935	European	Males and Females
eqtl-a-ENSG00000157303	SUSD3	30935	European	Males and Females
eqtl-a-ENSG00000164442	CITED2	30935	European	Males and Females
eqtl-a-ENSG00000164683	HEY1	30935	European	Males and Females
eqtl-a-ENSG00000166813	KIF7	30935	European	Males and Females
eqtl-a-ENSG00000167508	MVD	30935	European	Males and Females
eqtl-a-ENSG00000171617	ENC1	30935	European	Males and Females
eqtl-a-ENSG00000172183	ISG20	30935	European	Males and Females
eqtl-a-ENSG00000179981	TSHZ1	30935	European	Males and Females
eqtl-a-ENSG00000186468	RPS23	30935	European	Males and Females
eqtl-a-ENSG00000198959	TGM2	30935	European	Males and Females
eqtl-a-ENSG00000102804	TSC22D1	30895	European	Males and Females
eqtl-a-ENSG00000104765	BNIP3L	30895	European	Males and Females
eqtl-a-ENSG00000115750	TAF1B	30895	European	Males and Females
eqtl-a-ENSG00000170509	HSD17B13	30895	European	Males and Females
eqtl-a-ENSG00000128965	CHAC1	30859	European	Males and Females
eqtl-a-ENSG00000131095	GFAP	30859	European	Males and Females
eqtl-a-ENSG00000134873	CLDN10	30859	European	Males and Females
eqtl-a-ENSG00000140459	CYP11A1	30859	European	Males and Females
eqtl-a-ENSG00000111341	MGP	30819	European	Males and Females
eqtl-a-ENSG00000010072	SPRTN	30765	European	Males and Females
eqtl-a-ENSG00000075213	SEMA3A	30765	European	Males and Females
eqtl-a-ENSG00000092969	TGFB2	30765	European	Males and Females
eqtl-a-ENSG00000119508	NR4A3	30765	European	Males and Females
eqtl-a-ENSG00000122641	INHBA	30765	European	Males and Females
eqtl-a-ENSG00000134363	FST	30765	European	Males and Females
eqtl-a-ENSG00000136244	IL6	30765	European	Males and Females
eqtl-a-ENSG00000145362	ANK2	30765	European	Males and Females
eqtl-a-ENSG00000171517	LPAR3	30765	European	Males and Females
eqtl-a-ENSG00000184304	PRKD1	30765	European	Males and Females
eqtl-a-ENSG00000121807	CCR2	30758	European	Males and Females
eqtl-a-ENSG00000023892	DEF6	30721	European	Males and Females
eqtl-a-ENSG00000048828	FAM120A	30721	European	Males and Females
eqtl-a-ENSG00000091136	LAMB1	30721	European	Males and Females
eqtl-a-ENSG00000100030	MAPK1	30721	European	Males and Females
eqtl-a-ENSG00000121691	CAT	30721	European	Males and Females
eqtl-a-ENSG00000142208	AKT1	30721	European	Males and Females
eqtl-a-ENSG00000151914	DST	30721	European	Males and Females
eqtl-a-ENSG00000160255	ITGB2	30721	European	Males and Females
eqtl-a-ENSG00000173334	TRIB1	30721	European	Males and Females
eqtl-a-ENSG00000173575	CHD2	30721	European	Males and Females
eqtl-a-ENSG00000154188	ANGPT1	30681	European	Males and Females
eqtl-a-ENSG00000077092	RARB	30578	European	Males and Females
eqtl-a-ENSG00000104332	SFRP1	30551	European	Males and Females
eqtl-a-ENSG00000133106	EPSTI1	30551	European	Males and Females
eqtl-a-ENSG00000165060	FXN	30551	European	Males and Females
eqtl-a-ENSG00000185532	PRKG1	30551	European	Males and Females
eqtl-a-ENSG00000118260	CREB1	30507	European	Males and Females
eqtl-a-ENSG00000185483	ROR1	30381	European	Males and Females
eqtl-a-ENSG00000147465	STAR	30351	European	Males and Females
eqtl-a-ENSG00000134245	WNT2B	30257	European	Males and Females
eqtl-a-ENSG00000143257	NR1I3	30257	European	Males and Females
eqtl-a-ENSG00000074410	CA12	30137	European	Males and Females
eqtl-a-ENSG00000134138	MEIS2	30131	European	Males and Females
eqtl-a-ENSG00000135472	FAIM2	30131	European	Males and Females
eqtl-a-ENSG00000144852	NR1I2	30091	European	Males and Females
eqtl-a-ENSG00000111907	TPD52L1	29940	European	Males and Females
eqtl-a-ENSG00000128683	GAD1	29940	European	Males and Females
eqtl-a-ENSG00000172995	ARPP21	29940	European	Males and Females
eqtl-a-ENSG00000143632	ACTA1	29726	European	Males and Females
eqtl-a-ENSG00000133019	CHRM3	29703	European	Males and Females
eqtl-a-ENSG00000112164	GLP1R	29623	European	Males and Females
eqtl-a-ENSG00000172179	PRL	29432	European	Males and Females
eqtl-a-ENSG00000007171	NOS2	29285	European	Males and Females
eqtl-a-ENSG00000047457	CP	29218	European	Males and Females
eqtl-a-ENSG00000136931	NR5A1	29218	European	Males and Females
eqtl-a-ENSG00000156049	GNA14	29218	European	Males and Females
eqtl-a-ENSG00000157087	ATP2B2	29218	European	Males and Females
eqtl-a-ENSG00000176153	GPX2	29218	European	Males and Females
eqtl-a-ENSG00000176884	GRIN1	29218	European	Males and Females
eqtl-a-ENSG00000171094	ALK	29094	European	Males and Females
eqtl-a-ENSG00000176387	HSD11B2	29094	European	Males and Females
eqtl-a-ENSG00000198010	DLGAP2	29094	European	Males and Females
eqtl-a-ENSG00000211452	DIO1	29048	European	Males and Females
eqtl-a-ENSG00000085662	AKR1B1	28917	European	Males and Females
eqtl-a-ENSG00000087586	AURKA	28917	European	Males and Females
eqtl-a-ENSG00000089009	RPL6	28917	European	Males and Females
eqtl-a-ENSG00000175104	TRAF6	28917	European	Males and Females
eqtl-a-ENSG00000233276	GPX1	28917	European	Males and Females
eqtl-a-ENSG00000239672	NME1	28917	European	Males and Females
eqtl-a-ENSG00000115738	ID2	28877	European	Males and Females
eqtl-a-ENSG00000063978	RNF4	28703	European	Males and Females
eqtl-a-ENSG00000089157	RPLP0	28703	European	Males and Females
eqtl-a-ENSG00000100031	GGT1	28703	European	Males and Females
eqtl-a-ENSG00000109534	GAR1	28703	European	Males and Females
eqtl-a-ENSG00000128272	ATF4	28703	European	Males and Females
eqtl-a-ENSG00000082153	BZW1	28489	European	Males and Females
eqtl-a-ENSG00000255974	CYP2A6	26665	European	Males and Females
eqtl-a-ENSG00000064270	ATP2C2	26609	European	Males and Females
eqtl-a-ENSG00000066739	ATG2B	26609	European	Males and Females
eqtl-a-ENSG00000072274	TFRC	26609	European	Males and Females
eqtl-a-ENSG00000081181	ARG2	26609	European	Males and Females
eqtl-a-ENSG00000088832	FKBP1A	26609	European	Males and Females
eqtl-a-ENSG00000091831	ESR1	26609	European	Males and Females
eqtl-a-ENSG00000095319	NUP188	26609	European	Males and Females
eqtl-a-ENSG00000100285	NEFH	26609	European	Males and Females
eqtl-a-ENSG00000101266	CSNK2A1	26609	European	Males and Females
eqtl-a-ENSG00000104177	MYEF2	26609	European	Males and Females
eqtl-a-ENSG00000109475	RPL34	26609	European	Males and Females
eqtl-a-ENSG00000111424	VDR	26609	European	Males and Females
eqtl-a-ENSG00000118515	SGK1	26609	European	Males and Females
eqtl-a-ENSG00000121297	TSHZ3	26609	European	Males and Females
eqtl-a-ENSG00000133026	MYH10	26609	European	Males and Females
eqtl-a-ENSG00000133639	BTG1	26609	European	Males and Females
eqtl-a-ENSG00000135446	CDK4	26609	European	Males and Females
eqtl-a-ENSG00000135766	EGLN1	26609	European	Males and Females
eqtl-a-ENSG00000138735	PDE5A	26609	European	Males and Females
eqtl-a-ENSG00000139174	PRICKLE1	26609	European	Males and Females
eqtl-a-ENSG00000141551	CSNK1D	26609	European	Males and Females
eqtl-a-ENSG00000147872	PLIN2	26609	European	Males and Females
eqtl-a-ENSG00000148498	PARD3	26609	European	Males and Females
eqtl-a-ENSG00000163050	COQ8A	26609	European	Males and Females
eqtl-a-ENSG00000163918	RFC4	26609	European	Males and Females
eqtl-a-ENSG00000164850	GPER1	26609	European	Males and Females
eqtl-a-ENSG00000170425	ADORA2B	26609	European	Males and Females
eqtl-a-ENSG00000173638	SLC19A1	26609	European	Males and Females
eqtl-a-ENSG00000175899	A2M	26609	European	Males and Females
eqtl-a-ENSG00000175920	DOK7	26609	European	Males and Females
eqtl-a-ENSG00000183258	DDX41	26609	European	Males and Females
eqtl-a-ENSG00000184674	GSTT1	26609	European	Males and Females
eqtl-a-ENSG00000184897	H1-10	26609	European	Males and Females
eqtl-a-ENSG00000188827	SLX4	26609	European	Males and Females
eqtl-a-ENSG00000196923	PDLIM7	26609	European	Males and Females
eqtl-a-ENSG00000134853	PDGFRA	26569	European	Males and Females
eqtl-a-ENSG00000144848	ATG3	26569	European	Males and Females
eqtl-a-ENSG00000197728	RPS26	26569	European	Males and Females
eqtl-a-ENSG00000133835	HSD17B4	26410	European	Males and Females
eqtl-a-ENSG00000002016	RAD52	26395	European	Males and Females
eqtl-a-ENSG00000035862	TIMP2	26395	European	Males and Females
eqtl-a-ENSG00000078403	MLLT10	26395	European	Males and Females
eqtl-a-ENSG00000092199	HNRNPC	26395	European	Males and Females
eqtl-a-ENSG00000103064	SLC7A6	26395	European	Males and Females
eqtl-a-ENSG00000115942	ORC2	26395	European	Males and Females
eqtl-a-ENSG00000121957	GPSM2	26395	European	Males and Females
eqtl-a-ENSG00000125740	FOSB	26395	European	Males and Females
eqtl-a-ENSG00000127946	HIP1	26395	European	Males and Females
eqtl-a-ENSG00000135047	CTSL	26395	European	Males and Females
eqtl-a-ENSG00000145782	ATG12	26395	European	Males and Females
eqtl-a-ENSG00000146733	PSPH	26395	European	Males and Females
eqtl-a-ENSG00000153071	DAB2	26395	European	Males and Females
eqtl-a-ENSG00000171316	CHD7	26395	European	Males and Females
eqtl-a-ENSG00000183010	PYCR1	26395	European	Males and Females
eqtl-a-ENSG00000187240	DYNC2H1	26395	European	Males and Females
eqtl-a-ENSG00000188906	LRRK2	26395	European	Males and Females
eqtl-a-ENSG00000189079	ARID2	26395	European	Males and Females
eqtl-a-ENSG00000015133	CCDC88C	26196	European	Males and Females
eqtl-a-ENSG00000126217	MCF2L	26196	European	Males and Females
eqtl-a-ENSG00000131203	IDO1	26196	European	Males and Females
eqtl-a-ENSG00000138119	MYOF	26196	European	Males and Females
eqtl-a-ENSG00000151247	EIF4E	26196	European	Males and Females
eqtl-a-ENSG00000170989	S1PR1	26196	European	Males and Females
eqtl-a-ENSG00000197386	HTT	26196	European	Males and Females
eqtl-a-ENSG00000145016	RUBCN	26181	European	Males and Females
eqtl-a-ENSG00000160678	S100A1	26101	European	Males and Females
eqtl-a-ENSG00000160563	MED27	26022	European	Males and Females
eqtl-a-ENSG00000163430	FSTL1	25897	European	Males and Females
eqtl-a-ENSG00000051341	POLQ	25860	European	Males and Females
eqtl-a-ENSG00000156265	MAP3K7CL	25860	European	Males and Females
eqtl-a-ENSG00000196154	S100A4	25860	European	Males and Females
eqtl-a-ENSG00000111860	CEP85L	25690	European	Males and Females
eqtl-a-ENSG00000118200	CAMSAP2	25690	European	Males and Females
eqtl-a-ENSG00000156650	KAT6B	25690	European	Males and Females
eqtl-a-ENSG00000160007	ARHGAP35	25690	European	Males and Females
eqtl-a-ENSG00000164989	CCDC171	25690	European	Males and Females
eqtl-a-ENSG00000177283	FZD8	25690	European	Males and Females
eqtl-a-ENSG00000182185	RAD51B	25690	European	Males and Females
eqtl-a-ENSG00000189058	APOD	25690	European	Males and Females
eqtl-a-ENSG00000104324	CPQ	25650	European	Males and Females
eqtl-a-ENSG00000108518	PFN1	25646	European	Males and Females
eqtl-a-ENSG00000108786	HSD17B1	25646	European	Males and Females
eqtl-a-ENSG00000102445	RUBCNL	25476	European	Males and Females
eqtl-a-ENSG00000155011	DKK2	25476	European	Males and Females
eqtl-a-ENSG00000185379	RAD51D	25476	European	Males and Females
eqtl-a-ENSG00000107951	MTPAP	25447	European	Males and Females
eqtl-a-ENSG00000187531	SIRT7	25273	European	Males and Females
eqtl-a-ENSG00000137285	TUBB2B	24865	European	Males and Females
eqtl-a-ENSG00000101276	SLC52A3	24019	European	Males and Females
eqtl-a-ENSG00000158517	NCF1	23842	European	Males and Females
eqtl-a-ENSG00000162244	RPL29	23802	European	Males and Females
eqtl-a-ENSG00000122406	RPL5	23628	European	Males and Females
eqtl-a-ENSG00000134184	GSTM1	23628	European	Males and Females
eqtl-a-ENSG00000213366	GSTM2	23628	European	Males and Females
eqtl-a-ENSG00000171863	RPS7	22879	European	Males and Females
eqtl-a-ENSG00000111640	GAPDH	21986	European	Males and Females
eqtl-a-ENSG00000110455	ACCS	21335	European	Males and Females
eqtl-a-ENSG00000128487	SPECC1	21121	European	Males and Females
eqtl-a-ENSG00000163510	CWC22	21121	European	Males and Females
eqtl-a-ENSG00000177600	RPLP2	21121	European	Males and Females
eqtl-a-ENSG00000142937	RPS8	17970	European	Males and Females
eqtl-a-ENSG00000026025	VIM	14263	European	Males and Females
eqtl-a-ENSG00000043093	DCUN1D1	14263	European	Males and Females
eqtl-a-ENSG00000047315	POLR2B	14263	European	Males and Females
eqtl-a-ENSG00000054282	SDCCAG8	14263	European	Males and Females
eqtl-a-ENSG00000073792	IGF2BP2	14263	European	Males and Females
eqtl-a-ENSG00000076242	MLH1	14263	European	Males and Females
eqtl-a-ENSG00000084463	WBP11	14263	European	Males and Females
eqtl-a-ENSG00000087077	TRIP6	14263	European	Males and Females
eqtl-a-ENSG00000091542	ALKBH5	14263	European	Males and Females
eqtl-a-ENSG00000094804	CDC6	14263	European	Males and Females
eqtl-a-ENSG00000096717	SIRT1	14263	European	Males and Females
eqtl-a-ENSG00000100297	MCM5	14263	European	Males and Females
eqtl-a-ENSG00000100362	PVALB	14263	European	Males and Females
eqtl-a-ENSG00000100412	ACO2	14263	European	Males and Females
eqtl-a-ENSG00000100714	MTHFD1	14263	European	Males and Females
eqtl-a-ENSG00000100749	VRK1	14263	European	Males and Females
eqtl-a-ENSG00000100906	NFKBIA	14263	European	Males and Females
eqtl-a-ENSG00000105372	RPS19	14263	European	Males and Females
eqtl-a-ENSG00000106028	SSBP1	14263	European	Males and Females
eqtl-a-ENSG00000106211	HSPB1	14263	European	Males and Females
eqtl-a-ENSG00000106992	AK1	14263	European	Males and Females
eqtl-a-ENSG00000107854	TNKS2	14263	European	Males and Females
eqtl-a-ENSG00000107960	STN1	14263	European	Males and Females
eqtl-a-ENSG00000108651	UTP6	14263	European	Males and Females
eqtl-a-ENSG00000112473	SLC39A7	14263	European	Males and Females
eqtl-a-ENSG00000113368	LMNB1	14263	European	Males and Females
eqtl-a-ENSG00000116128	BCL9	14263	European	Males and Females
eqtl-a-ENSG00000116584	ARHGEF2	14263	European	Males and Females
eqtl-a-ENSG00000117399	CDC20	14263	European	Males and Females
eqtl-a-ENSG00000117400	MPL	14263	European	Males and Females
eqtl-a-ENSG00000122877	EGR2	14263	European	Males and Females
eqtl-a-ENSG00000126883	NUP214	14263	European	Males and Females
eqtl-a-ENSG00000127329	PTPRB	14263	European	Males and Females
eqtl-a-ENSG00000129757	CDKN1C	14263	European	Males and Females
eqtl-a-ENSG00000133101	CCNA1	14263	European	Males and Females
eqtl-a-ENSG00000133740	E2F5	14263	European	Males and Females
eqtl-a-ENSG00000136868	SLC31A1	14263	European	Males and Females
eqtl-a-ENSG00000137331	IER3	14263	European	Males and Females
eqtl-a-ENSG00000138413	IDH1	14263	European	Males and Females
eqtl-a-ENSG00000139131	YARS2	14263	European	Males and Females
eqtl-a-ENSG00000139278	GLIPR1	14263	European	Males and Females
eqtl-a-ENSG00000140332	TLE3	14263	European	Males and Females
eqtl-a-ENSG00000140350	ANP32A	14263	European	Males and Females
eqtl-a-ENSG00000140694	PARN	14263	European	Males and Females
eqtl-a-ENSG00000140941	MAP1LC3B	14263	European	Males and Females
eqtl-a-ENSG00000142168	SOD1	14263	European	Males and Females
eqtl-a-ENSG00000143368	SF3B4	14263	European	Males and Females
eqtl-a-ENSG00000143870	PDIA6	14263	European	Males and Females
eqtl-a-ENSG00000145545	SRD5A1	14263	European	Males and Females
eqtl-a-ENSG00000150782	IL18	14263	European	Males and Females
eqtl-a-ENSG00000151320	AKAP6	14263	European	Males and Females
eqtl-a-ENSG00000157456	CCNB2	14263	European	Males and Females
eqtl-a-ENSG00000159259	CHAF1B	14263	European	Males and Females
eqtl-a-ENSG00000162889	MAPKAPK2	14263	European	Males and Females
eqtl-a-ENSG00000163312	HELQ	14263	European	Males and Females
eqtl-a-ENSG00000164251	F2RL1	14263	European	Males and Females
eqtl-a-ENSG00000164885	CDK5	14263	European	Males and Females
eqtl-a-ENSG00000167552	TUBA1A	14263	European	Males and Females
eqtl-a-ENSG00000169032	MAP2K1	14263	European	Males and Females
eqtl-a-ENSG00000169288	MRPL1	14263	European	Males and Females
eqtl-a-ENSG00000169710	FASN	14263	European	Males and Females
eqtl-a-ENSG00000173786	CNP	14263	European	Males and Females
eqtl-a-ENSG00000178562	CD28	14263	European	Males and Females
eqtl-a-ENSG00000183207	RUVBL2	14263	European	Males and Females
eqtl-a-ENSG00000185591	SP1	14263	European	Males and Females
eqtl-a-ENSG00000197442	MAP3K5	14263	European	Males and Females
eqtl-a-ENSG00000197506	SLC28A3	14263	European	Males and Females
eqtl-a-ENSG00000198839	ZNF277	14263	European	Males and Females
eqtl-a-ENSG00000204264	PSMB8	14263	European	Males and Females
eqtl-a-ENSG00000204267	TAP2	14263	European	Males and Females
eqtl-a-ENSG00000204344	STK19	14263	European	Males and Females
eqtl-a-ENSG00000204390	HSPA1L	14263	European	Males and Females
eqtl-a-ENSG00000204444	APOM	14263	European	Males and Females
eqtl-a-ENSG00000214530	STARD10	14263	European	Males and Females
eqtl-a-ENSG00000231500	RPS18	14263	European	Males and Females
eqtl-a-ENSG00000232810	TNF	14263	European	Males and Females
eqtl-a-ENSG00000240065	PSMB9	14263	European	Males and Females
eqtl-a-ENSG00000240972	MIF	14263	European	Males and Females
eqtl-a-ENSG00000259207	ITGB3	14263	European	Males and Females
eqtl-a-ENSG00000121769	FABP3	13755	European	Males and Females
eqtl-a-ENSG00000163631	ALB	12011	European	Males and Females
eqtl-a-ENSG00000204983	PRSS1	12011	European	Males and Females
eqtl-a-ENSG00000259384	GH1	12011	European	Males and Females
eqtl-a-ENSG00000069956	MAPK6	11496	European	Males and Females
eqtl-a-ENSG00000143252	SDHC	11496	European	Males and Females
eqtl-a-ENSG00000172115	CYCS	11496	European	Males and Females
eqtl-a-ENSG00000204370	SDHD	11496	European	Males and Females
eqtl-a-ENSG00000005893	LAMP2	9188	European	Males and Females
eqtl-a-ENSG00000049860	HEXB	9188	European	Males and Females
eqtl-a-ENSG00000069535	MAOB	9188	European	Males and Females
eqtl-a-ENSG00000072506	HSD17B10	9188	European	Males and Females
eqtl-a-ENSG00000085185	BCORL1	9188	European	Males and Females
eqtl-a-ENSG00000086758	HUWE1	9188	European	Males and Females
eqtl-a-ENSG00000089472	HEPH	9188	European	Males and Females
eqtl-a-ENSG00000094631	HDAC6	9188	European	Males and Females
eqtl-a-ENSG00000101846	STS	9188	European	Males and Females
eqtl-a-ENSG00000101868	POLA1	9188	European	Males and Females
eqtl-a-ENSG00000102024	PLS3	9188	European	Males and Females
eqtl-a-ENSG00000102125	TAFAZZIN	9188	European	Males and Females
eqtl-a-ENSG00000102181	CD99L2	9188	European	Males and Females
eqtl-a-ENSG00000126016	AMOT	9188	European	Males and Females
eqtl-a-ENSG00000129682	FGF13	9188	European	Males and Females
eqtl-a-ENSG00000130066	SAT1	9188	European	Males and Females
eqtl-a-ENSG00000130830	MPP1	9188	European	Males and Females
eqtl-a-ENSG00000130985	UBA1	9188	European	Males and Females
eqtl-a-ENSG00000131724	IL13RA1	9188	European	Males and Females
eqtl-a-ENSG00000131828	PDHA1	9188	European	Males and Females
eqtl-a-ENSG00000137154	RPS6	9188	European	Males and Females
eqtl-a-ENSG00000137312	FLOT1	9188	European	Males and Females
eqtl-a-ENSG00000143947	RPS27A	9188	European	Males and Females
eqtl-a-ENSG00000147044	CASK	9188	European	Males and Females
eqtl-a-ENSG00000147082	CCNB3	9188	European	Males and Females
eqtl-a-ENSG00000147383	NSDHL	9188	European	Males and Females
eqtl-a-ENSG00000147403	RPL10	9188	European	Males and Females
eqtl-a-ENSG00000156709	AIFM1	9188	European	Males and Females
eqtl-a-ENSG00000160211	G6PD	9188	European	Males and Females
eqtl-a-ENSG00000165168	CYBB	9188	European	Males and Females
eqtl-a-ENSG00000165240	ATP7A	9188	European	Males and Females
eqtl-a-ENSG00000165609	NUDT5	9188	European	Males and Females
eqtl-a-ENSG00000165704	HPRT1	9188	European	Males and Females
eqtl-a-ENSG00000167548	KMT2D	9188	European	Males and Females
eqtl-a-ENSG00000168397	ATG4B	9188	European	Males and Females
eqtl-a-ENSG00000169057	MECP2	9188	European	Males and Females
eqtl-a-ENSG00000169083	AR	9188	European	Males and Females
eqtl-a-ENSG00000172534	HCFC1	9188	European	Males and Females
eqtl-a-ENSG00000172809	RPL38	9188	European	Males and Females
eqtl-a-ENSG00000173221	GLRX	9188	European	Males and Females
eqtl-a-ENSG00000184216	IRAK1	9188	European	Males and Females
eqtl-a-ENSG00000184481	FOXO4	9188	European	Males and Females
eqtl-a-ENSG00000184634	MED12	9188	European	Males and Females
eqtl-a-ENSG00000186416	NKRF	9188	European	Males and Females
eqtl-a-ENSG00000186871	ERCC6L	9188	European	Males and Females
eqtl-a-ENSG00000189221	MAOA	9188	European	Males and Females
eqtl-a-ENSG00000196338	NLGN3	9188	European	Males and Females
eqtl-a-ENSG00000198910	L1CAM	9188	European	Males and Females
eqtl-a-ENSG00000213551	DNAJC9	9188	European	Males and Females
eqtl-a-ENSG00000217930	PAM16	9188	European	Males and Females
eqtl-a-ENSG00000213999	MEF2B	8269	European	Males and Females
eqtl-a-ENSG00000083845	RPS5	6421	European	Males and Females
eqtl-a-ENSG00000112306	RPS12	6421	European	Males and Females
eqtl-a-ENSG00000114391	RPL24	6421	European	Males and Females
eqtl-a-ENSG00000132196	HSD17B7	6421	European	Males and Females
eqtl-a-ENSG00000147604	RPL7	6421	European	Males and Females
eqtl-a-ENSG00000170727	BOP1	6421	European	Males and Females
eqtl-a-ENSG00000170889	RPS9	6421	European	Males and Females
eqtl-a-ENSG00000228716	DHFR	6421	European	Males and Females
eqtl-a-ENSG00000205542	TMSB4X	5502	European	Males and Females
eqtl-a-ENSG00000231767	PKLR	5502	European	Males and Females
eqtl-a-ENSG00000109321	AREG	4169	European	Males and Females
ebi-a-GCST90018799	Breast cancer	257730	European	Males and Females
